# Supplementary material for: Vertebroplasty in patients with multiple myeloma with vertebral compression fractures: protocol for a single-blind randomised controlled trial
Source: PubMed Central journal article supplement — BMJ Open. 2021 Sep 6;11(9):e045854. doi: 10.1136/bmjopen-2020-045854 (PMC8422322; doi:10.1136/bmjopen-2020-045854), 2021-09-06
Supplement: bmjopen-2020-045854.draft_revisions.pdf [file bmjopen-2020-045854.draft_revisions.pdf]

# BMJ Open

BMJ Open is committed to open peer review. As part of this commitment we make the peer review history of every article we publish publicly available.

When an article is published we post the peer reviewers' comments and the authors' responses online. We also post the versions of the paper that were used during peer review. These are the versions that the peer review comments apply to.

The versions of the paper that follow are the versions that were submitted during the peer review process. They are not the versions of record or the final published versions. They should not be cited or distributed as the published version of this manuscript.

BMJ Open is an open access journal and the full, final, typeset and author-corrected version of record of the manuscript is available on our site with no access controls, subscription charges or pay-per-view fees (<http://bmjopen.bmj.com>).

If you have any questions on BMJ Open's open peer review process please email [info.bmjopen@bmj.com](mailto:info.bmjopen@bmj.com)

# BMJ Open

## Vertebroplasty in multiple myeloma patients with vertebral compression fractures: Protocol for a single-blind randomized controlled trial.

|                               |                                                                                                                                                                                                                                                                                                                    |
|-------------------------------|--------------------------------------------------------------------------------------------------------------------------------------------------------------------------------------------------------------------------------------------------------------------------------------------------------------------|
| Journal:                      | <i>BMJ Open</i>                                                                                                                                                                                                                                                                                                    |
| Manuscript ID                 | bmjopen-2020-045854                                                                                                                                                                                                                                                                                                |
| Article Type:                 | Protocol                                                                                                                                                                                                                                                                                                           |
| Date Submitted by the Author: | 23-Oct-2020                                                                                                                                                                                                                                                                                                        |
| Complete List of Authors:     | Wickstroem, Line; Sygehus Lillebælt Middelfart Sygehus, Carreon, Leah; Sygehus Lillebalt Middelfart Sygehus Lund, Thomas; Odense University Hospital Abildgaard, Niels; Odense University Hospital Lorenzen, Marianne; Sygehus Lillebalt Middelfart Sygehus Andersen, Mikkel; Sygehus Lillebalt Middelfart Sygehus |
| Keywords:                     | Spine < ORTHOPAEDIC & TRAUMA SURGERY, Myeloma < HAEMATOLOGY, ONCOLOGY                                                                                                                                                                                                                                              |
|                               |                                                                                                                                                                                                                                                                                                                    |

SCHOLARONE™  
Manuscripts

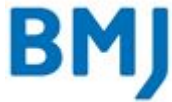

I, the Submitting Author has the right to grant and does grant on behalf of all authors of the Work (as defined in the below author licence), an exclusive licence and/or a non-exclusive licence for contributions from authors who are: i) UK Crown employees; ii) where BMJ has agreed a CC-BY licence shall apply, and/or iii) in accordance with the terms applicable for US Federal Government officers or employees acting as part of their official duties; on a worldwide, perpetual, irrevocable, royalty-free basis to BMJ Publishing Group Ltd ("BMJ") its licensees and where the relevant Journal is co-owned by BMJ to the co-owners of the Journal, to publish the Work in this journal and any other BMJ products and to exploit all rights, as set out in our [licence](#).

The Submitting Author accepts and understands that any supply made under these terms is made by BMJ to the Submitting Author unless you are acting as an employee on behalf of your employer or a postgraduate student of an affiliated institution which is paying any applicable article publishing charge ("APC") for Open Access articles. Where the Submitting Author wishes to make the Work available on an Open Access basis (and intends to pay the relevant APC), the terms of reuse of such Open Access shall be governed by a Creative Commons licence – details of these licences and which [Creative Commons](#) licence will apply to this Work are set out in our licence referred to above.

Other than as permitted in any relevant BMJ Author's Self Archiving Policies, I confirm this Work has not been accepted for publication elsewhere, is not being considered for publication elsewhere and does not duplicate material already published. I confirm all authors consent to publication of this Work and authorise the granting of this licence.

1  
2  
3  
4 Vertebroplasty in multiple myeloma patients with vertebral compression fractures:  
5 Protocol for a single-blind randomized controlled trial.  
6  
7  
8  
9

10 Line Adsbøll Wickstrøm<sup>1</sup>, MD, Leah Y. Carreon, MD, MSc<sup>1,2</sup>,  
11 Thomas Lund, MD, PhD<sup>3</sup>, Niels Abildgaard, MD, DMSc<sup>3</sup>, Marianne Dyrby Lorenzen<sup>1</sup>, RN,MCN,  
12 Mikkel Ø. Andersen, MD<sup>1,2</sup>  
13  
14  
15  
16  
17

18 Author affiliations:  
19

- 20  
21 1. Spine Surgery & Research, Spinecenter of Southern Denmark, Lillebaelt HospitalMiddelfart  
22  
23 2. Department of Regional Health Research, Faculty of Health Services, University of Southern  
24 Denmark, Odense, Denmark  
25  
26 3. Department of Haematology, Odense University Hospital, Odense, Denmark  
27  
28  
29  
30

31 Corresponding author:  
32

33 Line Adsbøll Wickstrøm, line.adsboll.wickstrom@rsyd.dk  
34  
35  
36  
37  
38  
39  
40  
41  
42  
43  
44  
45  
46  
47  
48  
49  
50  
51  
52  
53  
54  
55  
56  
57  
58  
59  
60

Version 1.1 – 19.10.2020

**Abstract:****Introduction:**

Multiple myeloma is a plasma cell cancer where about 1/3 of the patients present with pathological fractures at the time of diagnosis. Despite treatment, the majority of the patients will develop additional fractures during the course of the disease. Vertebral fractures are very painful and affect patients' daily function. Because survival and prognosis has improved significantly over the last two decades for multiple myeloma (MM) patients, there is an increased need to focus on optimal fracture treatment. Traditionally, fracture pain is treated conservatively with opioids, bisphosphonates, bracing, and radiation therapy. Vertebral augmentation has been used the last three decades as a minimally invasive treatment option for vertebral compression fractures, but the evidence base for the efficacy is weak.

We describe a randomized controlled trial to assess the impact of vertebroplasty on clinical outcome in the treatment of MM patients with painful vertebral fractures.

**Methods:**

One hundred multiple myeloma patients with painful vertebral fractures will be randomized in a prospective, single blinded, multicenter, clinical trial where patients are randomized to either usual care or usual care supplemented with vertebroplasty with a possibility of crossover 4 weeks after randomization. The primary outcome will be change in Oswestry Disability Index assessed at follow up at 4, 8, 26 and 52 weeks.

**Analysis:**

Primary and secondary outcomes are assessed at baseline and at 4, 8, 26 and 52 weeks. Categorical data will be presented by means of frequencies and related percentages; continuous data will be displayed by means of descriptive statistics. Repeated measures ANCOVA with baseline ODI, VAS pain, EQ-5D-3L, and number of levels involved will be performed.

**Ethics and dissemination:**

The study has been evaluated by the Regional Committees on Health Research for Southern Denmark (S-20200075) and notified and approved by the Region of Southern Denmark and listed in the internal record, journal no. 20/22355. All participants provide consent. The protocol will follow the SPIRIT (Standard Protocol Items for Randomized Trials) statement. The Danish Myeloma Patient Organization supports the study. Findings will be disseminated in peer-reviewed publications and presented at national and international conferences. Trial registration number NCT04533217.

**Strengths and limitations of this study:***Strengths*

- Randomized controlled trial
- Nationwide study (participation of all hematologic departments in Denmark)

*Limitations*

- Single-blinded randomization

## Introduction:

Multiple myeloma is a plasma cell cancer in the bone marrow associated with activated osteoclastic bone degradation, lack of bone formation, and pathological fractures with protracted healing due to inhibited osteoblast function (1, 2). These biological changes are induced by the expansion of proliferating malignant plasma cells in the bone marrow (2).

The incidence is about 7 per 100,000 in Denmark, equivalent to approximately about 400 new cases a year (3). At the time of diagnosis pathological fractures are present in about 1/3 of the patients and a greater proportion develop fractures during the course of the disease (3, 4). The annual risk of spontaneous spinal fractures is 15-24 % despite bisphosphonate prophylaxis (3).

Although multiple myeloma is incurable, survival and prognosis has improved significantly over the last two decades (5). This justifies and necessitates increased focus on optimal fracture treatment to ensure good physical function and quality of life for the patients' remaining lifetime. Vertebral fractures are very painful and affect patients' daily function (2, 4, 6). Traditionally, the fracture pain is treated conservatively with opioids, bisphosphonates, bracing, and radiation therapy (3).

Vertebroplasty was first reported in the late 80s for the treatment of vertebral hemangiomas and osteolytic vertebral tumors (7). Under fluoroscopy, a Jamshidi needle is inserted through the pedicles (8) into the vertebral body. Polymethylmethacrylate is injected into the vertebral body, still under imaging guidance, to minimize extravasation into the spinal canal. Vertebral augmentation, including percutaneous vertebroplasty (PVP) and kyphoplasty (KP), has been used as a minimally invasive treatment option for vertebral compression fractures (VCFs) (4, 9, 10).

The procedure is considered to be well suited for treatment of patients with malignant spine disease as it can be done under local anaesthesia, provides rapid pain relief (11, 12), and prevents prolonged immobilization. PVP and KP provide stability within the fractured vertebral body by preventing microscopic movement and macroscopic collapse. It has also been suggested that polymethylmethacrylate (PMMA) bone cement induces exothermic reactions that are toxic to nerve endings and therefore provide pain relief (13).

Two randomized trials and a later review was published in 2009 (14, 15) and 2018 (16), respectively, regarding vertebral augmentation. The two trials were done in different patient populations, namely patients with benign osteoporosis. The disappointing outcome of these two trials has unfortunately led to uncertainties regarding the effect in other indications, such as metastatic disease.

In 2019, a systematic review on vertebral augmentation of cancer related painful vertebral lesions was published (12). This review included not only randomized studies, but also other publications involving vertebral augmentation techniques. In all 87 studies were included in the study and meta-analysis was performed. The review demonstrated clinically relevant improvement in pain and health related quality of life.

A recent Danish national clinical guideline (17, 18) on painful vertebral compression fractures, caused by cancer including multiple myeloma, recommends percutaneous vertebroplasty as pain management. The evidence is mainly based on two randomized studies: The CAFE study by Berenson et al. (19) including 49 patients suffering from multiple myeloma randomized between kyphoplasty and conservative treatment and the study by Audat et al.(20) randomizing 27 patients to either conventional therapy or conventional therapy adding vertebroplasty or kyphoplasty. The recommendations in the Danish guideline are weak

1  
2  
3  
4  
5  
6  
7  
8  
9  
10  
11  
12  
13  
14  
15  
16  
17  
18  
19  
20  
21  
22  
23  
24  
25  
26  
27  
28  
29  
30  
31  
32  
33  
34  
35  
36  
37  
38  
39  
40  
41  
42  
43  
44  
45  
46  
47  
48  
49  
50  
51  
52  
53  
54  
55  
56  
57  
58  
59  
60

due to risk of bias, including lack of blinding in randomized studies. In addition, the CAFE study was further downgraded for indirectness as the study contains a population consisting predominantly of patients with primary cancer other than multiple myeloma.

### *Rationale for this study*

Evidence-based guidelines for supplementing chemotherapy with vertebral augmentation when treating multiple myeloma patients with pathological fractures are lacking. The overall evidence from the two randomized controlled trials comparing supplementary vertebral augmentation to usual care is of low quality (17, 18) and requires more robust investigations regarding the role of vertebroplasty in the treatment algorithm of multiple myeloma with spinal involvement.

For that reason, we decided to perform a single blinded, randomized, controlled trial comparing usual care versus usual care supplemented with vertebroplasty in treating multiple myeloma patients with pathological fractures.

### **Methods and analysis:**

#### *Purpose*

To examine the efficacy of PVP in multiple myeloma patients with vertebral compression fracture, based on improvement in patient reported outcome

#### *Study design and patient involvement*

The initial idea behind this project was created by a patient appointed by the Danish Cancer Society to participate in the working group behind the National Clinical Guideline on percutaneous vertebroplasty for the palliative treatment of malignant vertebral compression fractures caused by multiple myeloma (17, 18). She urged the group members to set up a study to provide high-quality evidence needed to recommend the treatment.

The study design is a randomized, prospective, single blinded, multicentre, clinical trial where patients are randomized to either usual care or usual care supplemented with vertebroplasty with a possibility of crossover 4 weeks after randomization.

The study design has been developed in collaboration with the Danish Myeloma Patients' Association "Dansk Myelomatose Forening" and designed in accordance with the SPIRIT (Standard Protocol Items: Recommendations for Interventional Trials) guidelines (21).

The trial design is illustrated in Figure 1 and trial timeline in Figure 2.

#### *Trial sites*

The trial is a multi-centre trial with the participation of all Danish haematological departments. The departments are as follows:

- Department of Haematology, Aalborg University Hospital
- Department of Haematology, Aarhus University Hospital
- Department of Haematology, Holstebro Regional Hospital
- Department of Haematology, University Hospital of Southern Denmark, Esbjerg

- Department of Haematology, University Hospital of Southern Denmark, Vejle
- Department of Haematology, Zealand University Hospital, Roskilde
- Department of Haematology, Herlev Hospital
- Department of Haematology, Rigshospitalet, Copenhagen
- Department of Haematology, Odense University Hospital

Participating spine surgical units are as follows:

- Department of Orthopaedic Surgery, Rigshospitalet
- Spine Center of Southern Denmark, Lillebaelt Hospital, Middelfart
- Department of Orthopaedic Surgery, Aarhus University Hospital

### *Study population*

Study subjects will be recruited from patients diagnosed with multiple myeloma assessed and found eligible for vertebroplasty due to painful vertebral compression fractures. Possible candidates will be identified at the departments of haematology where the patients are treated for their disease.

### *Inclusion criteria:*

- Patients diagnosed with symptomatic multiple myeloma and spinal compression fractures
- Fractures verified on MRI- or CT-scan between and including Th6 and L5
- Fracture involves 4 vertebral body levels or less
- PVP can be done in one session
- Possible indication for vertebroplasty
- Back pain score measured on a visual analogue scale (VAS)  $\geq 5$
- Age  $\geq 18$  years
- Able to understand and read Danish
- Written informed consent
- Relevant pain started  $\leq 3$  months prior to inclusion

### *Exclusion criteria:*

- Contra-indications for spine surgery
- Platelets  $< 30$  mia/l
- Bedridden
- Presence of neurologic deficit
- Psychological or psychiatric disorder that is expected to interfere with compliance

### *Randomization:*

Prior to randomization, the patients will be divided into two groups, stratifying between patients with known multiple myeloma with a newly diagnosed spinal fracture and relevant pain  $\leq 3$  months prior to inclusion and patients with newly diagnosed multiple myeloma with relevant pain associated to a spine fracture initiating  $\leq 3$  months prior to the diagnosis.

Furthermore, to ensure balanced control and intervention groups the included patients at randomization will be stratified according to 1) planned PVP of 1 vs. 2-4 levels, and 2) former vertebral fractures that are not planned treated with PVP.



1  
2  
3  
4  
5  
6 The patients in each subgroup will be randomized to one of two parallel treatment arms allocated in a 1:1  
7 ratio. Sealed numbered envelopes containing electronically randomized group allocations will be prepared  
8 prior to trial commencement. Following informed consent, a sealed pre-randomized envelope will be  
9 allocated by the study nurse and the patient label affixed to the envelope.

#### 11 *Control Treatment*

12  
13 The patients will receive the treating departments' standard care.

#### 15 *Investigational treatment:*

16  
17 The investigational treatment arm will be the group receiving supplementary vertebroplasty of the  
18 vertebral compression fractures.

#### 20 *Outcomes*

##### 22 *Primary outcome:*

- 23  
24 • Back-specific Functional Status using Oswestry Disability Index (ODI) at time of randomization and  
25 4-weeks post-randomization. The ODI assesses pain-related physical functioning in spinal disorders.  
26 (22). The ODI contains 10 questions about how back pain affects the ability to manage everyday  
27 life. These are summarized in a score ranging from 0 to 100. Higher scores reflect worse pain and  
28 disability.

##### 31 *Secondary outcomes:*

- 32  
33 • Self-reported average pain intensity (VAS) during the preceding 24 hours at enrolment, and weekly  
34 in 12 weeks after enrolment. The rating scale from 0 to 10, with higher scores indicating more  
35 severe pain.
- 36  
37 • Health Related Quality of Life (HRQL) on the EuroQol 5-dimension 3-level (EQ-5D-3L) (23). EQ-5D-3L  
38 is a widely used generic measure of HRQL. It evaluates five dimensions: mobility, self-care, usual  
39 activities, pain/discomfort and anxiety/depression, each with three levels of severity. The resulting  
40 health is converted into a single summary index with a total score ranging from -0.6 to 1, where 1  
41 corresponds to perfect health.
- 42  
43 • HRQL according to the FACT-G, EORTC QLQ C30 and MY20 questionnaires.
- 44  
45 • Long-term stability of the treated vertebral bone (e.g., fracture, vertebral body height, or  
46 malalignment) as measures by long-standing radiographs.
- 47  
48 • Questionnaire about general health services, including questions about e.g. sick leave and home  
49 care.

##### 50 *Data collection:*

51  
52 After informed consent is obtained from the patient, the hematologist will fill out screening forms  
53 regarding disease stage, lines of treatment, current disease status, bisphosphonate status, and pain relief  
54 treatment. The patient will complete surveys including the ODI, VAS pain score and QoL. Time points for  
55 data collection is presented in Table 1.

##### 57 *Sample size*

1  
2  
3  
4 The sample size calculations for this study is a challenge, as there are very few published papers reporting  
5 outcomes following vertebroplasty on vertebral fractures due to multiple myeloma. The sample size  
6 calculations are thus based on results from treating osteoporotic vertebral fractures with vertebroplasty. To  
7 obtain a minimal clinically relevant improvement of at least 15 points on the Oswestry Disability Index, we  
8 need to enrol 44 patients in each group. To account for approximately 10 % dropout we aim to enroll 100  
9 patients.  
10

$$11 \quad N = (Z(\text{crit}) + Z(\text{pwr}))^2 \times s^2 / \text{MIREDF}^2,$$

12 with a mean minimum difference between groups of 15, SD=25, two tailed p=0.05, assuming a normal  
13 distribution with Z (crit)=1.96, Z (pwr)=0.80  
14

#### 15 *Analyses:*

##### 16 *Baseline characteristics:*

17 The baseline characteristics of patients and operative details will be recorded.  
18

##### 19 *Statistical analysis:*

20 Data will be analyzed according to their type using STATA, i.e.; categorical data will be presented by means  
21 of frequencies and related percentages; continuous data will be displayed by means of descriptive statistics  
22 (mean, standard deviation, number of observations, minimum, median, maximum).  
23

24 The primary outcome measure will be improvement in ODI scores at 4 weeks after initiation of treatment.  
25 Repeated measures ANCOVA with baseline ODI, VAS pain, EQ-5D-3L, and number of levels involved will be  
26 performed.  
27

##### 28 *Ethics and dissemination:*

29 The study will be performed according to the Declaration of Helsinki and the Danish Code of Conduct for  
30 Research Integrity (24). The study has been evaluated by the Regional Committees on Health Research for  
31 Southern Denmark (S-20200075), and has been notified to and approved by the Region of Southern  
32 Denmark and listed in the internal record, journal no. 20/22355. , and permission to extract data from  
33 hospital records will be obtained from the patients. Consent to use patient-reported information from the  
34 DaneSpine database is obtained electronically prior to patients completing the questionnaires. Patients  
35 who do not consent will not be included.  
36

37 Findings will be disseminated in peer-reviewed publications and presented at national and international  
38 conferences following guidance from the SPIRIT guidelines.  
39  
40  
41  
42  
43

#### 44 **Discussion:**

45 This article presents a protocol for a single blinded randomized controlled trial comparing usual care versus  
46 usual care supplemented with vertebroplasty in treating multiple myeloma patients with painful vertebral  
47 fractures. Further prospectively registered data on health, social variables and patient-reported outcomes  
48 are collected.  
49

50 As the median survival is significantly better for MM patients than for patients with spinal metastases  
51 associated with solid cancers it justifies and necessitates increased focus on optimal fracture treatment in  
52 MM patients specifically. An increasing number of MM patients experience more than 5 years, even more  
53  
54  
55  
56  
57  
58  
59  
60

1  
2  
3  
4 than 10 years survival, which highlights the importance of ensuring good physical function and quality of  
5 life for the patients.  
6

7 The outcome of the proposed project will impact future national and international guidelines on the  
8 treatment regimen for patients with multiple myeloma and vertebral fractures.  
9

10 The main strength of this study is the randomized treatment assignments, reducing the risk of selection  
11 bias.  
12  
13

#### 14 15 **Author contributorship statement and conflict of interest:**

- 16 - Line Adsbøll Wickstrøm: PhD student, investigator
- 17 - Leah Y. Carreon: Co-supervisor
- 18 - Thomas Lund: Consultant, mediation of contact to the Danish Myeloma Patients'  
19 Association "Dansk Myelomatose Forening"
- 20 - Niels Abildgaard: Co-supervisor, mediation of contact to the Danish hematologic  
21 departments
- 22 - Marianne Dyrby Lorenzen: Administration
- 23 - Mikkel Ø. Andersen: Principal supervisor

24  
25  
26 All authors have participated in the design and organization of the study. Authors have no affiliation  
27 apart from stated, and have no conflicts of interests.  
28  
29

#### 30 31 **Funding:**

32 Expences, including salary, tuition fees and miscellaneous is applied for from the following:

- 33 - Faculty of Health Sciences, University of Southern Denmark
- 34 - Research means, Region of Southern Denmark or Hospital Lillebaelt Research Committee
- 35 - External funding

36  
37 No funding has yet been collected.  
38  
39

#### 40 41 **Datasharing:**

42  
43 When the project is terminated, data from the project database will be archived at the Danish  
44 National Archives, and the research group will save an anonymized version of patient information  
45 from the database. After the project results are published, interested researchers will have two  
46 options for re-use of the data: upon receiving required permits they may apply for data extracts  
47 from DaneSpine and from the Danish National Archives – or they may receive anonymized raw  
48 data from DaneSpine and the project data base from us. This way, data will  
49 be Findable, Accessible, Interoperable and Reusable.  
50  
51  
52  
53  
54  
55  
56  
57  
58  
59  
60

## References

1. Bataille R. et al. "The multiple myeloma bone eco-system and its relation to oncogenesis" *Morphologie*. 2015 Jun;99(325):31-7. doi: 10.1016/j.morpho.2015.03.002.
2. Thorsteinsdottir S. et al. "Fractures and survival in multiple myeloma: results from a population-based study". *Haematologica*. 2019. Dec 2. pii: haematol.2019.230011. doi: 10.3324/haematol.2019.230011.
3. Simony A. et al. "Pain reduction after percutaneous vertebroplasty for myeloma-associated vertebral fractures". *Danish Medical Journal*. 2014. Dec;61(12):A4945.
4. Kyriakou C. et al. "The role of cement augmentation with percutaneous vertebroplasty and balloon kyphoplasty for the treatment of vertebral compression fractures in multiple myeloma: a consensus statement from the International Myeloma Working Group (IMWG)". *Blood Cancer Journal*. 2019. Feb 26;9(3):27. doi: 10.1038/s41408-019-0187-7.
5. Gregersen H. et al. "The impact of comorbidity on mortality in multiple myeloma: a Danish nationwide population-based study". *Cancer Medicine*. 2017. Jul;6(7):1807-1816. doi: 10.1002/cam4.1128.
6. Hall S.E. "A case-control study of quality of life and functional impairment in women with long standing vertebral osteoporotic fracture". *Osteoporosis International*. 1999;9(6): 508-15.
7. Galibert P, et al. Preliminary note on the treatment of vertebral angioma by percutaneous acrylic vertebroplasty. *Neurochirurgie* 1987;33:166-8.
8. Zoarski GH, et al. Percutaneous vertebroplasty: A to Z. *Tech Vasc Interv Radiol* 2002;5:223-38.
9. Malhotra K. et al. "Spinal disease in myeloma: cohort analysis at a specialist spinal surgery centre indicates benefit of early surgical augmentation or bracing". *BMC Cancer*. 2016. Jul 11;16:444. doi: 10.1186/s12885-016-2495-7.
10. Nas Ö. F. "Effectiveness of percutaneous vertebroplasty in patients with multiple myeloma having vertebral pain". *Diagnostic and Interventional Radiology*. 2016. May-Jun;22(3):263-8. doi: 10.5152/dir.2016.15201.
11. Patel M. S. et al: "Evaluating Treatment Strategies for Spinal Lesions in Multiple Myeloma: A Review of the Literature". *International Journal of Spine Surgery*. 2018. Oct 15;12(5):571-581. doi: 10.14444/5070.

12. Sørensen S. T. et al.: "Vertebroplasty or kyphoplasty as palliative treatment for cancer-related vertebral compression fractures: a systematic review". *Spine Journal*. 2019. Jun;19(6):1067-1075. doi: 10.1016/j.spinee.2019.02.012.
13. CG, et al. CT fluoroscopy-guided percutaneous vertebroplasty for the treatment of osteolytic breast cancer metastases: results in 62 sessions with 86 vertebrae treated. *J Vasc Interv Radiol* 2008;19:1596–606.
14. Buchbinder R. et al. A randomized trial of vertebroplasty for painful osteoporotic vertebral fractures. *The New England journal of medicine*. 2009;361(6):557-68.
15. Kallmes DF. et al. A randomized trial of vertebroplasty for osteoporotic spinal fractures. *The New England journal of medicine*. 2009;361(6):569-79
16. Buchbinder R. et al. Percutaneous vertebroplasty for osteoporotic vertebral compression fracture. *Cochrane Database Syst Rev* 2018;4:CD006349.
17. <http://drks.ortopaedi.dk/nkr-for-perkutan-vertebroplastik-til-palliativ-behandling-af-maligne-sammenfald-i-ryggen/>
18. Rousing R, Kirkegaard AO, Nielsen M, Holtved E, Sørensen LH, Lund T, Olesen V, Andersen MØ. Percutaneous vertebroplasty as treatment of malignant vertebral lesions: a systematic review and GRADE evaluation resulting in a Danish national clinical guideline. *Eur Spine J*. 2020 Apr 3. doi: 10.1007/s00586-020-06392-w. [Epub ahead of print] Review. PubMed PMID: 32246231.
19. Berenson J. et al. "Balloon kyphoplasty versus non-surgical fracture management for treatment of painful vertebral body compression fractures in patients with cancer: a multicentre, randomised controlled trial". *Lancet Oncology*. 2011. Mar;12(3):225-35. doi: 10.1016/S1470-2045(11)70008-0.
20. Audat Z. A. et al. "Comparison if the addition of multilevel vertebral augmentation to conventional therapy will improve the outcome of patients with multiple myeloma". *Scoliosis Spinal Disorder*. 2016. Dec 29;11:47. doi: 10.1186/s13013-016-0107-6.
21. <https://www.spirit-statement.org/publications-downloads/>, assed 2020-03-23
22. Fairbank JC , Pynsent PB . The Oswestry Disability Index. *Spine* 2000;25:2940–53.doi:10.1097/00007632-200011150-00017
23. Obradovic M. et al. Validity and responsiveness of EuroQol-5 dimension (EQ-5D) versus Short Form-6 dimension (SF-6D) questionnaire in chronic pain. *Health Qual Life Outcomes* 2013;11:110.doi:10.1186/1477-7525-11-110

24. The Danish Code of Conduct for Research Integrity — Uddannelses- og  
Forskningsministeriet. <http://ufm.dk/publikationer/2014/the-danish-code-of-conduct-for-research-integrity>

Tabel 1 Datacollection - timeline

| Clinical tools   | At incl. | 1 week post-incl. | 2 w | 3 w | 4 w | 5 w | 6 w | 7 w | 8 w | 9 w | 10 w | 11 w | 12 w | 26 w | 52 w |
|------------------|----------|-------------------|-----|-----|-----|-----|-----|-----|-----|-----|------|------|------|------|------|
| ODI              | x        |                   |     |     | x   |     |     |     | x   |     |      |      |      | x    | x    |
| VAS leg and back | x        | x                 | x   | x   | x   | x   | x   | x   | x   | x   | x    | x    | x    | x    | x    |
| EQ-5D            | x        |                   |     |     | x   |     |     |     | x   |     |      |      |      | x    | x    |
| FACT-G           | x        |                   |     |     |     |     |     |     |     |     |      |      | x    |      | x    |
| EORTC QLQ-C30    | x        |                   |     |     |     |     |     |     |     |     |      |      | x    |      | x    |
| EORTC QLQ-MY20   | x        |                   |     |     |     |     |     |     |     |     |      |      | x    |      | x    |
| X-ray            | x        |                   |     |     |     |     |     |     |     |     |      |      | x    |      | x    |
| MRI              | x        |                   |     |     |     |     |     |     |     |     |      |      |      |      |      |



# Reporting checklist for protocol of a clinical trial.

Based on the SPIRIT guidelines.

## Instructions to authors

Complete this checklist by entering the page numbers from your manuscript where readers will find each of the items listed below.

Your article may not currently address all the items on the checklist. Please modify your text to include the missing information. If you are certain that an item does not apply, please write "n/a" and provide a short explanation.

Upload your completed checklist as an extra file when you submit to a journal.

In your methods section, say that you used the SPIRIT reporting guidelines, and cite them as:

Chan A-W, Tetzlaff JM, Gøtzsche PC, Altman DG, Mann H, Berlin J, Dickersin K, Hróbjartsson A, Schulz KF, Parulekar WR, Krleža-Jerić K, Laupacis A, Moher D. SPIRIT 2013 Explanation and Elaboration: Guidance for protocols of clinical trials. *BMJ*. 2013;346:e7586

|                                             |                     | Reporting Item                                                                                               | Page Number |
|---------------------------------------------|---------------------|--------------------------------------------------------------------------------------------------------------|-------------|
| <b>Administrative information</b>           |                     |                                                                                                              |             |
| Title                                       | <a href="#">#1</a>  | Descriptive title identifying the study design, population, interventions, and, if applicable, trial acronym | 1           |
| Trial registration                          | <a href="#">#2a</a> | Trial identifier and registry name. If not yet registered, name of intended registry                         | 2           |
| Trial registration: data set                | <a href="#">#2b</a> | All items from the World Health Organization Trial Registration Data Set                                     | 2           |
| Protocol version                            | <a href="#">#3</a>  | Date and version identifier                                                                                  | 1           |
| Funding                                     | <a href="#">#4</a>  | Sources and types of financial, material, and other support                                                  | 8           |
| Roles and responsibilities: contributorship | <a href="#">#5a</a> | Names, affiliations, and roles of protocol contributors                                                      | 1, 8        |



|    |                           |                     |                                                              |     |
|----|---------------------------|---------------------|--------------------------------------------------------------|-----|
| 1  | Roles and                 | <a href="#">#5b</a> | Name and contact information for the trial sponsor           | n/a |
| 2  | responsibilities:         |                     |                                                              |     |
| 3  | sponsor contact           |                     |                                                              |     |
| 4  | information               |                     |                                                              |     |
| 5  |                           |                     |                                                              |     |
| 6  |                           |                     |                                                              |     |
| 7  |                           |                     |                                                              |     |
| 8  | Roles and                 | <a href="#">#5c</a> | Role of study sponsor and funders, if any, in study design;  | n/a |
| 9  | responsibilities:         |                     | collection, management, analysis, and interpretation of      |     |
| 10 | sponsor and funder        |                     | data; writing of the report; and the decision to submit the  |     |
| 11 |                           |                     | report for publication, including whether they will have     |     |
| 12 |                           |                     | ultimate authority over any of these activities              |     |
| 13 |                           |                     |                                                              |     |
| 14 |                           |                     |                                                              |     |
| 15 |                           |                     |                                                              |     |
| 16 |                           |                     |                                                              |     |
| 17 | Roles and                 | <a href="#">#5d</a> | Composition, roles, and responsibilities of the coordinating | n/a |
| 18 | responsibilities:         |                     | centre, steering committee, endpoint adjudication            |     |
| 19 | committees                |                     | committee, data management team, and other individuals       |     |
| 20 |                           |                     | or groups overseeing the trial, if applicable (see Item 21a  |     |
| 21 |                           |                     | for data monitoring committee)                               |     |
| 22 |                           |                     |                                                              |     |
| 23 |                           |                     |                                                              |     |
| 24 |                           |                     |                                                              |     |
| 25 | <b>Introduction</b>       |                     |                                                              |     |
| 26 |                           |                     |                                                              |     |
| 27 |                           |                     |                                                              |     |
| 28 | Background and            | <a href="#">#6a</a> | Description of research question and justification for       | 3-4 |
| 29 | rationale                 |                     | undertaking the trial, including summary of relevant         |     |
| 30 |                           |                     | studies (published and unpublished) examining benefits       |     |
| 31 |                           |                     | and harms for each intervention                              |     |
| 32 |                           |                     |                                                              |     |
| 33 |                           |                     |                                                              |     |
| 34 |                           |                     |                                                              |     |
| 35 | Background and            | <a href="#">#6b</a> | Explanation for choice of comparators                        | n/a |
| 36 | rationale: choice of      |                     |                                                              |     |
| 37 | comparators               |                     |                                                              |     |
| 38 |                           |                     |                                                              |     |
| 39 |                           |                     |                                                              |     |
| 40 | Objectives                | <a href="#">#7</a>  | Specific objectives or hypotheses                            | n/a |
| 41 |                           |                     |                                                              |     |
| 42 |                           |                     |                                                              |     |
| 43 | Trial design              | <a href="#">#8</a>  | Description of trial design including type of trial (eg,     | 4   |
| 44 |                           |                     | parallel group, crossover, factorial, single group),         |     |
| 45 |                           |                     | allocation ratio, and framework (eg, superiority,            |     |
| 46 |                           |                     | equivalence, non-inferiority, exploratory)                   |     |
| 47 |                           |                     |                                                              |     |
| 48 |                           |                     |                                                              |     |
| 49 |                           |                     |                                                              |     |
| 50 | <b>Methods:</b>           |                     |                                                              |     |
| 51 | <b>Participants,</b>      |                     |                                                              |     |
| 52 | <b>interventions, and</b> |                     |                                                              |     |
| 53 | <b>outcomes</b>           |                     |                                                              |     |
| 54 |                           |                     |                                                              |     |
| 55 |                           |                     |                                                              |     |
| 56 |                           |                     |                                                              |     |
| 57 | Study setting             | <a href="#">#9</a>  | Description of study settings (eg, community clinic,         | 4-5 |
| 58 |                           |                     | academic hospital) and list of countries where data will be  |     |
| 59 |                           |                     |                                                              |     |
| 60 |                           |                     |                                                              |     |

collected. Reference to where list of study sites can be obtained

|    |                      |                      |                                                                                                                                                                                                                                                                                                                                                                                |
|----|----------------------|----------------------|--------------------------------------------------------------------------------------------------------------------------------------------------------------------------------------------------------------------------------------------------------------------------------------------------------------------------------------------------------------------------------|
| 1  |                      |                      |                                                                                                                                                                                                                                                                                                                                                                                |
| 2  |                      |                      |                                                                                                                                                                                                                                                                                                                                                                                |
| 3  |                      |                      |                                                                                                                                                                                                                                                                                                                                                                                |
| 4  | Eligibility criteria | <a href="#">#10</a>  | Inclusion and exclusion criteria for participants. If applicable, eligibility criteria for study centres and individuals who will perform the interventions (eg, surgeons, psychotherapists)                                                                                                                                                                                   |
| 5  |                      |                      | 5                                                                                                                                                                                                                                                                                                                                                                              |
| 6  |                      |                      |                                                                                                                                                                                                                                                                                                                                                                                |
| 7  |                      |                      |                                                                                                                                                                                                                                                                                                                                                                                |
| 8  |                      |                      |                                                                                                                                                                                                                                                                                                                                                                                |
| 9  |                      |                      |                                                                                                                                                                                                                                                                                                                                                                                |
| 10 |                      |                      |                                                                                                                                                                                                                                                                                                                                                                                |
| 11 | Interventions:       | <a href="#">#11a</a> | Interventions for each group with sufficient detail to allow replication, including how and when they will be administered                                                                                                                                                                                                                                                     |
| 12 | description          |                      | 5-6                                                                                                                                                                                                                                                                                                                                                                            |
| 13 |                      |                      |                                                                                                                                                                                                                                                                                                                                                                                |
| 14 |                      |                      |                                                                                                                                                                                                                                                                                                                                                                                |
| 15 |                      |                      |                                                                                                                                                                                                                                                                                                                                                                                |
| 16 |                      |                      |                                                                                                                                                                                                                                                                                                                                                                                |
| 17 | Interventions:       | <a href="#">#11b</a> | Criteria for discontinuing or modifying allocated interventions for a given trial participant (eg, drug dose change in response to harms, participant request, or improving / worsening disease)                                                                                                                                                                               |
| 18 | modifications        |                      | 5-6                                                                                                                                                                                                                                                                                                                                                                            |
| 19 |                      |                      |                                                                                                                                                                                                                                                                                                                                                                                |
| 20 |                      |                      |                                                                                                                                                                                                                                                                                                                                                                                |
| 21 |                      |                      |                                                                                                                                                                                                                                                                                                                                                                                |
| 22 |                      |                      |                                                                                                                                                                                                                                                                                                                                                                                |
| 23 |                      |                      |                                                                                                                                                                                                                                                                                                                                                                                |
| 24 | Interventions:       | <a href="#">#11c</a> | Strategies to improve adherence to intervention protocols, and any procedures for monitoring adherence (eg, drug tablet return; laboratory tests)                                                                                                                                                                                                                              |
| 25 | adherence            |                      | n/a                                                                                                                                                                                                                                                                                                                                                                            |
| 26 |                      |                      |                                                                                                                                                                                                                                                                                                                                                                                |
| 27 |                      |                      |                                                                                                                                                                                                                                                                                                                                                                                |
| 28 |                      |                      |                                                                                                                                                                                                                                                                                                                                                                                |
| 29 | Interventions:       | <a href="#">#11d</a> | Relevant concomitant care and interventions that are permitted or prohibited during the trial                                                                                                                                                                                                                                                                                  |
| 30 | concomitant care     |                      | n/a                                                                                                                                                                                                                                                                                                                                                                            |
| 31 |                      |                      |                                                                                                                                                                                                                                                                                                                                                                                |
| 32 |                      |                      |                                                                                                                                                                                                                                                                                                                                                                                |
| 33 | Outcomes             | <a href="#">#12</a>  | Primary, secondary, and other outcomes, including the specific measurement variable (eg, systolic blood pressure), analysis metric (eg, change from baseline, final value, time to event), method of aggregation (eg, median, proportion), and time point for each outcome. Explanation of the clinical relevance of chosen efficacy and harm outcomes is strongly recommended |
| 34 |                      |                      | 6                                                                                                                                                                                                                                                                                                                                                                              |
| 35 |                      |                      |                                                                                                                                                                                                                                                                                                                                                                                |
| 36 |                      |                      |                                                                                                                                                                                                                                                                                                                                                                                |
| 37 |                      |                      |                                                                                                                                                                                                                                                                                                                                                                                |
| 38 |                      |                      |                                                                                                                                                                                                                                                                                                                                                                                |
| 39 |                      |                      |                                                                                                                                                                                                                                                                                                                                                                                |
| 40 |                      |                      |                                                                                                                                                                                                                                                                                                                                                                                |
| 41 |                      |                      |                                                                                                                                                                                                                                                                                                                                                                                |
| 42 |                      |                      |                                                                                                                                                                                                                                                                                                                                                                                |
| 43 |                      |                      |                                                                                                                                                                                                                                                                                                                                                                                |
| 44 |                      |                      |                                                                                                                                                                                                                                                                                                                                                                                |
| 45 | Participant timeline | <a href="#">#13</a>  | Time schedule of enrolment, interventions (including any run-ins and washouts), assessments, and visits for participants. A schematic diagram is highly recommended (see Figure)                                                                                                                                                                                               |
| 46 |                      |                      | 12, 14                                                                                                                                                                                                                                                                                                                                                                         |
| 47 |                      |                      |                                                                                                                                                                                                                                                                                                                                                                                |
| 48 |                      |                      |                                                                                                                                                                                                                                                                                                                                                                                |
| 49 |                      |                      |                                                                                                                                                                                                                                                                                                                                                                                |
| 50 |                      |                      |                                                                                                                                                                                                                                                                                                                                                                                |
| 51 |                      |                      |                                                                                                                                                                                                                                                                                                                                                                                |
| 52 | Sample size          | <a href="#">#14</a>  | Estimated number of participants needed to achieve study objectives and how it was determined, including clinical and statistical assumptions supporting any sample size calculations                                                                                                                                                                                          |
| 53 |                      |                      | 6-7                                                                                                                                                                                                                                                                                                                                                                            |
| 54 |                      |                      |                                                                                                                                                                                                                                                                                                                                                                                |
| 55 |                      |                      |                                                                                                                                                                                                                                                                                                                                                                                |
| 56 |                      |                      |                                                                                                                                                                                                                                                                                                                                                                                |
| 57 |                      |                      |                                                                                                                                                                                                                                                                                                                                                                                |
| 58 |                      |                      |                                                                                                                                                                                                                                                                                                                                                                                |
| 59 |                      |                      |                                                                                                                                                                                                                                                                                                                                                                                |
| 60 |                      |                      |                                                                                                                                                                                                                                                                                                                                                                                |

|    |                                          |                      |                                                                                                                                                                                                                                                                                                                                                          |     |
|----|------------------------------------------|----------------------|----------------------------------------------------------------------------------------------------------------------------------------------------------------------------------------------------------------------------------------------------------------------------------------------------------------------------------------------------------|-----|
| 1  | Recruitment                              | <a href="#">#15</a>  | Strategies for achieving adequate participant enrolment to reach target sample size                                                                                                                                                                                                                                                                      | n/a |
| 2  |                                          |                      |                                                                                                                                                                                                                                                                                                                                                          |     |
| 3  |                                          |                      |                                                                                                                                                                                                                                                                                                                                                          |     |
| 4  |                                          |                      |                                                                                                                                                                                                                                                                                                                                                          |     |
| 5  | <b>Methods:</b>                          |                      |                                                                                                                                                                                                                                                                                                                                                          |     |
| 6  | <b>Assignment of</b>                     |                      |                                                                                                                                                                                                                                                                                                                                                          |     |
| 7  | <b>interventions (for</b>                |                      |                                                                                                                                                                                                                                                                                                                                                          |     |
| 8  | <b>controlled trials)</b>                |                      |                                                                                                                                                                                                                                                                                                                                                          |     |
| 9  |                                          |                      |                                                                                                                                                                                                                                                                                                                                                          |     |
| 10 |                                          |                      |                                                                                                                                                                                                                                                                                                                                                          |     |
| 11 |                                          |                      |                                                                                                                                                                                                                                                                                                                                                          |     |
| 12 | Allocation: sequence generation          | <a href="#">#16a</a> | Method of generating the allocation sequence (eg, computer-generated random numbers), and list of any factors for stratification. To reduce predictability of a random sequence, details of any planned restriction (eg, blocking) should be provided in a separate document that is unavailable to those who enrol participants or assign interventions | 5-6 |
| 13 |                                          |                      |                                                                                                                                                                                                                                                                                                                                                          |     |
| 14 |                                          |                      |                                                                                                                                                                                                                                                                                                                                                          |     |
| 15 |                                          |                      |                                                                                                                                                                                                                                                                                                                                                          |     |
| 16 |                                          |                      |                                                                                                                                                                                                                                                                                                                                                          |     |
| 17 |                                          |                      |                                                                                                                                                                                                                                                                                                                                                          |     |
| 18 |                                          |                      |                                                                                                                                                                                                                                                                                                                                                          |     |
| 19 |                                          |                      |                                                                                                                                                                                                                                                                                                                                                          |     |
| 20 |                                          |                      |                                                                                                                                                                                                                                                                                                                                                          |     |
| 21 |                                          |                      |                                                                                                                                                                                                                                                                                                                                                          |     |
| 22 |                                          |                      |                                                                                                                                                                                                                                                                                                                                                          |     |
| 23 |                                          |                      |                                                                                                                                                                                                                                                                                                                                                          |     |
| 24 | Allocation concealment mechanism         | <a href="#">#16b</a> | Mechanism of implementing the allocation sequence (eg, central telephone; sequentially numbered, opaque, sealed envelopes), describing any steps to conceal the sequence until interventions are assigned                                                                                                                                                | 5-6 |
| 25 |                                          |                      |                                                                                                                                                                                                                                                                                                                                                          |     |
| 26 |                                          |                      |                                                                                                                                                                                                                                                                                                                                                          |     |
| 27 |                                          |                      |                                                                                                                                                                                                                                                                                                                                                          |     |
| 28 |                                          |                      |                                                                                                                                                                                                                                                                                                                                                          |     |
| 29 |                                          |                      |                                                                                                                                                                                                                                                                                                                                                          |     |
| 30 |                                          |                      |                                                                                                                                                                                                                                                                                                                                                          |     |
| 31 | Allocation: implementation               | <a href="#">#16c</a> | Who will generate the allocation sequence, who will enrol participants, and who will assign participants to interventions                                                                                                                                                                                                                                | 5-6 |
| 32 |                                          |                      |                                                                                                                                                                                                                                                                                                                                                          |     |
| 33 |                                          |                      |                                                                                                                                                                                                                                                                                                                                                          |     |
| 34 |                                          |                      |                                                                                                                                                                                                                                                                                                                                                          |     |
| 35 |                                          |                      |                                                                                                                                                                                                                                                                                                                                                          |     |
| 36 | Blinding (masking)                       | <a href="#">#17a</a> | Who will be blinded after assignment to interventions (eg, trial participants, care providers, outcome assessors, data analysts), and how                                                                                                                                                                                                                | 5-6 |
| 37 |                                          |                      |                                                                                                                                                                                                                                                                                                                                                          |     |
| 38 |                                          |                      |                                                                                                                                                                                                                                                                                                                                                          |     |
| 39 |                                          |                      |                                                                                                                                                                                                                                                                                                                                                          |     |
| 40 |                                          |                      |                                                                                                                                                                                                                                                                                                                                                          |     |
| 41 |                                          |                      |                                                                                                                                                                                                                                                                                                                                                          |     |
| 42 | Blinding (masking): emergency unblinding | <a href="#">#17b</a> | If blinded, circumstances under which unblinding is permissible, and procedure for revealing a participant's allocated intervention during the trial                                                                                                                                                                                                     | 5-6 |
| 43 |                                          |                      |                                                                                                                                                                                                                                                                                                                                                          |     |
| 44 |                                          |                      |                                                                                                                                                                                                                                                                                                                                                          |     |
| 45 |                                          |                      |                                                                                                                                                                                                                                                                                                                                                          |     |
| 46 |                                          |                      |                                                                                                                                                                                                                                                                                                                                                          |     |
| 47 | <b>Methods: Data</b>                     |                      |                                                                                                                                                                                                                                                                                                                                                          |     |
| 48 | <b>collection,</b>                       |                      |                                                                                                                                                                                                                                                                                                                                                          |     |
| 49 | <b>management, and</b>                   |                      |                                                                                                                                                                                                                                                                                                                                                          |     |
| 50 | <b>analysis</b>                          |                      |                                                                                                                                                                                                                                                                                                                                                          |     |
| 51 |                                          |                      |                                                                                                                                                                                                                                                                                                                                                          |     |
| 52 |                                          |                      |                                                                                                                                                                                                                                                                                                                                                          |     |
| 53 |                                          |                      |                                                                                                                                                                                                                                                                                                                                                          |     |
| 54 | Data collection plan                     | <a href="#">#18a</a> | Plans for assessment and collection of outcome, baseline, and other trial data, including any related processes to promote data quality (eg, duplicate measurements,                                                                                                                                                                                     | 13  |
| 55 |                                          |                      |                                                                                                                                                                                                                                                                                                                                                          |     |
| 56 |                                          |                      |                                                                                                                                                                                                                                                                                                                                                          |     |
| 57 |                                          |                      |                                                                                                                                                                                                                                                                                                                                                          |     |
| 58 |                                          |                      |                                                                                                                                                                                                                                                                                                                                                          |     |
| 59 |                                          |                      |                                                                                                                                                                                                                                                                                                                                                          |     |
| 60 |                                          |                      |                                                                                                                                                                                                                                                                                                                                                          |     |

training of assessors) and a description of study instruments (eg, questionnaires, laboratory tests) along with their reliability and validity, if known. Reference to where data collection forms can be found, if not in the protocol

|    |                            |                      |                                                                |
|----|----------------------------|----------------------|----------------------------------------------------------------|
| 1  |                            |                      |                                                                |
| 2  |                            |                      |                                                                |
| 3  |                            |                      |                                                                |
| 4  |                            |                      |                                                                |
| 5  |                            |                      |                                                                |
| 6  |                            |                      |                                                                |
| 7  |                            |                      |                                                                |
| 8  |                            |                      |                                                                |
| 9  | Data collection plan:      | <a href="#">#18b</a> | Plans to promote participant retention and complete            |
| 10 | retention                  |                      | follow-up, including list of any outcome data to be            |
| 11 |                            |                      | collected for participants who discontinue or deviate from     |
| 12 |                            |                      | intervention protocols                                         |
| 13 |                            |                      |                                                                |
| 14 |                            |                      |                                                                |
| 15 |                            |                      |                                                                |
| 16 | Data management            | <a href="#">#19</a>  | Plans for data entry, coding, security, and storage,           |
| 17 |                            |                      | including any related processes to promote data quality        |
| 18 |                            |                      | (eg, double data entry; range checks for data values).         |
| 19 |                            |                      | Reference to where details of data management                  |
| 20 |                            |                      | procedures can be found, if not in the protocol                |
| 21 |                            |                      |                                                                |
| 22 |                            |                      |                                                                |
| 23 |                            |                      |                                                                |
| 24 | Statistics: outcomes       | <a href="#">#20a</a> | Statistical methods for analysing primary and secondary        |
| 25 |                            |                      | outcomes. Reference to where other details of the              |
| 26 |                            |                      | statistical analysis plan can be found, if not in the protocol |
| 27 |                            |                      |                                                                |
| 28 |                            |                      |                                                                |
| 29 |                            |                      |                                                                |
| 30 | Statistics: additional     | <a href="#">#20b</a> | Methods for any additional analyses (eg, subgroup and          |
| 31 | analyses                   |                      | adjusted analyses)                                             |
| 32 |                            |                      |                                                                |
| 33 |                            |                      |                                                                |
| 34 | Statistics: analysis       | <a href="#">#20c</a> | Definition of analysis population relating to protocol non-    |
| 35 | population and             |                      | adherence (eg, as randomised analysis), and any                |
| 36 | missing data               |                      | statistical methods to handle missing data (eg, multiple       |
| 37 |                            |                      | imputation)                                                    |
| 38 |                            |                      |                                                                |
| 39 |                            |                      |                                                                |
| 40 |                            |                      |                                                                |
| 41 | <b>Methods: Monitoring</b> |                      |                                                                |
| 42 |                            |                      |                                                                |
| 43 | Data monitoring:           | <a href="#">#21a</a> | Composition of data monitoring committee (DMC);                |
| 44 | formal committee           |                      | summary of its role and reporting structure; statement of      |
| 45 |                            |                      | whether it is independent from the sponsor and competing       |
| 46 |                            |                      | interests; and reference to where further details about its    |
| 47 |                            |                      | charter can be found, if not in the protocol. Alternatively,   |
| 48 |                            |                      | an explanation of why a DMC is not needed                      |
| 49 |                            |                      |                                                                |
| 50 |                            |                      |                                                                |
| 51 |                            |                      |                                                                |
| 52 |                            |                      |                                                                |
| 53 |                            |                      |                                                                |
| 54 | Data monitoring:           | <a href="#">#21b</a> | Description of any interim analyses and stopping               |
| 55 | interim analysis           |                      | guidelines, including who will have access to these interim    |
| 56 |                            |                      | results and make the final decision to terminate the trial     |
| 57 |                            |                      |                                                                |
| 58 |                            |                      |                                                                |
| 59 |                            |                      |                                                                |
| 60 |                            |                      |                                                                |

|    |                                      |                      |                                                                                                                                                                                                                                    |     |
|----|--------------------------------------|----------------------|------------------------------------------------------------------------------------------------------------------------------------------------------------------------------------------------------------------------------------|-----|
| 1  | Harms                                | <a href="#">#22</a>  | Plans for collecting, assessing, reporting, and managing solicited and spontaneously reported adverse events and other unintended effects of trial interventions or trial conduct                                                  | n/a |
| 2  |                                      |                      |                                                                                                                                                                                                                                    |     |
| 3  |                                      |                      |                                                                                                                                                                                                                                    |     |
| 4  |                                      |                      |                                                                                                                                                                                                                                    |     |
| 5  |                                      |                      |                                                                                                                                                                                                                                    |     |
| 6  |                                      |                      |                                                                                                                                                                                                                                    |     |
| 7  |                                      |                      |                                                                                                                                                                                                                                    |     |
| 8  | Auditing                             | <a href="#">#23</a>  | Frequency and procedures for auditing trial conduct, if any, and whether the process will be independent from investigators and the sponsor                                                                                        | n/a |
| 9  |                                      |                      |                                                                                                                                                                                                                                    |     |
| 10 |                                      |                      |                                                                                                                                                                                                                                    |     |
| 11 |                                      |                      |                                                                                                                                                                                                                                    |     |
| 12 |                                      |                      |                                                                                                                                                                                                                                    |     |
| 13 |                                      |                      |                                                                                                                                                                                                                                    |     |
| 14 | <b>Ethics and dissemination</b>      |                      |                                                                                                                                                                                                                                    |     |
| 15 |                                      |                      |                                                                                                                                                                                                                                    |     |
| 16 |                                      |                      |                                                                                                                                                                                                                                    |     |
| 17 | Research ethics approval             | <a href="#">#24</a>  | Plans for seeking research ethics committee / institutional review board (REC / IRB) approval                                                                                                                                      | 7   |
| 18 |                                      |                      |                                                                                                                                                                                                                                    |     |
| 19 |                                      |                      |                                                                                                                                                                                                                                    |     |
| 20 |                                      |                      |                                                                                                                                                                                                                                    |     |
| 21 | Protocol amendments                  | <a href="#">#25</a>  | Plans for communicating important protocol modifications (eg, changes to eligibility criteria, outcomes, analyses) to relevant parties (eg, investigators, REC / IRBs, trial participants, trial registries, journals, regulators) | n/a |
| 22 |                                      |                      |                                                                                                                                                                                                                                    |     |
| 23 |                                      |                      |                                                                                                                                                                                                                                    |     |
| 24 |                                      |                      |                                                                                                                                                                                                                                    |     |
| 25 |                                      |                      |                                                                                                                                                                                                                                    |     |
| 26 |                                      |                      |                                                                                                                                                                                                                                    |     |
| 27 |                                      |                      |                                                                                                                                                                                                                                    |     |
| 28 | Consent or assent                    | <a href="#">#26a</a> | Who will obtain informed consent or assent from potential trial participants or authorised surrogates, and how (see Item 32)                                                                                                       | 6   |
| 29 |                                      |                      |                                                                                                                                                                                                                                    |     |
| 30 |                                      |                      |                                                                                                                                                                                                                                    |     |
| 31 |                                      |                      |                                                                                                                                                                                                                                    |     |
| 32 |                                      |                      |                                                                                                                                                                                                                                    |     |
| 33 |                                      |                      |                                                                                                                                                                                                                                    |     |
| 34 | Consent or assent: ancillary studies | <a href="#">#26b</a> | Additional consent provisions for collection and use of participant data and biological specimens in ancillary studies, if applicable                                                                                              | n/a |
| 35 |                                      |                      |                                                                                                                                                                                                                                    |     |
| 36 |                                      |                      |                                                                                                                                                                                                                                    |     |
| 37 |                                      |                      |                                                                                                                                                                                                                                    |     |
| 38 |                                      |                      |                                                                                                                                                                                                                                    |     |
| 39 | Confidentiality                      | <a href="#">#27</a>  | How personal information about potential and enrolled participants will be collected, shared, and maintained in order to protect confidentiality before, during, and after the trial                                               | 7   |
| 40 |                                      |                      |                                                                                                                                                                                                                                    |     |
| 41 |                                      |                      |                                                                                                                                                                                                                                    |     |
| 42 |                                      |                      |                                                                                                                                                                                                                                    |     |
| 43 |                                      |                      |                                                                                                                                                                                                                                    |     |
| 44 |                                      |                      |                                                                                                                                                                                                                                    |     |
| 45 |                                      |                      |                                                                                                                                                                                                                                    |     |
| 46 | Declaration of interests             | <a href="#">#28</a>  | Financial and other competing interests for principal investigators for the overall trial and each study site                                                                                                                      | 8   |
| 47 |                                      |                      |                                                                                                                                                                                                                                    |     |
| 48 |                                      |                      |                                                                                                                                                                                                                                    |     |
| 49 |                                      |                      |                                                                                                                                                                                                                                    |     |
| 50 | Data access                          | <a href="#">#29</a>  | Statement of who will have access to the final trial dataset, and disclosure of contractual agreements that limit such access for investigators                                                                                    | n/a |
| 51 |                                      |                      |                                                                                                                                                                                                                                    |     |
| 52 |                                      |                      |                                                                                                                                                                                                                                    |     |
| 53 |                                      |                      |                                                                                                                                                                                                                                    |     |
| 54 |                                      |                      |                                                                                                                                                                                                                                    |     |
| 55 |                                      |                      |                                                                                                                                                                                                                                    |     |
| 56 | Ancillary and post trial care        | <a href="#">#30</a>  | Provisions, if any, for ancillary and post-trial care, and for compensation to those who suffer harm from trial                                                                                                                    | n/a |
| 57 |                                      |                      |                                                                                                                                                                                                                                    |     |
| 58 |                                      |                      |                                                                                                                                                                                                                                    |     |
| 59 |                                      |                      |                                                                                                                                                                                                                                    |     |
| 60 |                                      |                      |                                                                                                                                                                                                                                    |     |

participation

|                                                 |                                                |                                                                                                                                                                                                                                                                                                          |     |
|-------------------------------------------------|------------------------------------------------|----------------------------------------------------------------------------------------------------------------------------------------------------------------------------------------------------------------------------------------------------------------------------------------------------------|-----|
| 1<br>2<br>3<br>4<br>5<br>6<br>7<br>8<br>9<br>10 | Dissemination policy:<br>trial results         | <a href="#">#31a</a> Plans for investigators and sponsor to communicate trial results to participants, healthcare professionals, the public, and other relevant groups (eg, via publication, reporting in results databases, or other data sharing arrangements), including any publication restrictions | 7   |
| 11<br>12<br>13<br>14                            | Dissemination policy:<br>authorship            | <a href="#">#31b</a> Authorship eligibility guidelines and any intended use of professional writers                                                                                                                                                                                                      | n/a |
| 15<br>16<br>17<br>18                            | Dissemination policy:<br>reproducible research | <a href="#">#31c</a> Plans, if any, for granting public access to the full protocol, participant-level dataset, and statistical code                                                                                                                                                                     | n/a |

## 19 Appendices

|                                        |                               |                                                                                                                                                                                                                    |     |
|----------------------------------------|-------------------------------|--------------------------------------------------------------------------------------------------------------------------------------------------------------------------------------------------------------------|-----|
| 21<br>22<br>23<br>24                   | Informed consent<br>materials | <a href="#">#32</a> Model consent form and other related documentation given to participants and authorised surrogates                                                                                             | n/a |
| 25<br>26<br>27<br>28<br>29<br>30<br>31 | Biological specimens          | <a href="#">#33</a> Plans for collection, laboratory evaluation, and storage of biological specimens for genetic or molecular analysis in the current trial and for future use in ancillary studies, if applicable | n/a |

32 The SPIRIT checklist is distributed under the terms of the Creative Commons Attribution License CC-  
33 BY-ND 3.0. This checklist was completed on 28. September 2020 using  
34 <https://www.goodreports.org/>, a tool made by the [EQUATOR Network](#) in collaboration with  
35 [Penelope.ai](#)  
36  
37  
38  
39  
40  
41  
42  
43  
44  
45  
46  
47  
48  
49  
50  
51  
52  
53  
54  
55  
56  
57  
58  
59  
60

# BMJ Open

## Vertebroplasty in multiple myeloma patients with vertebral compression fractures: Protocol for a single-blind randomized controlled trial.

|                                 |                                                                                                                                                                                                                                                                                                                    |
|---------------------------------|--------------------------------------------------------------------------------------------------------------------------------------------------------------------------------------------------------------------------------------------------------------------------------------------------------------------|
| Journal:                        | <i>BMJ Open</i>                                                                                                                                                                                                                                                                                                    |
| Manuscript ID                   | bmjopen-2020-045854.R1                                                                                                                                                                                                                                                                                             |
| Article Type:                   | Protocol                                                                                                                                                                                                                                                                                                           |
| Date Submitted by the Author:   | 24-Mar-2021                                                                                                                                                                                                                                                                                                        |
| Complete List of Authors:       | Wickstroem, Line; Sygehus Lillebælt Middelfart Sygehus, Carreon, Leah; Sygehus Lillebalt Middelfart Sygehus Lund, Thomas; Odense University Hospital Abildgaard, Niels; Odense University Hospital Lorenzen, Marianne; Sygehus Lillebalt Middelfart Sygehus Andersen, Mikkel; Sygehus Lillebalt Middelfart Sygehus |
| <b>Primary Subject Heading</b>: | Surgery                                                                                                                                                                                                                                                                                                            |
| Secondary Subject Heading:      | Oncology, Haematology (incl blood transfusion)                                                                                                                                                                                                                                                                     |
| Keywords:                       | Spine < ORTHOPAEDIC & TRAUMA SURGERY, Myeloma < HAEMATOLOGY, ONCOLOGY                                                                                                                                                                                                                                              |
|                                 |                                                                                                                                                                                                                                                                                                                    |

SCHOLARONE™  
Manuscripts



I, the Submitting Author has the right to grant and does grant on behalf of all authors of the Work (as defined in the below author licence), an exclusive licence and/or a non-exclusive licence for contributions from authors who are: i) UK Crown employees; ii) where BMJ has agreed a CC-BY licence shall apply, and/or iii) in accordance with the terms applicable for US Federal Government officers or employees acting as part of their official duties; on a worldwide, perpetual, irrevocable, royalty-free basis to BMJ Publishing Group Ltd ("BMJ") its licensees and where the relevant Journal is co-owned by BMJ to the co-owners of the Journal, to publish the Work in this journal and any other BMJ products and to exploit all rights, as set out in our [licence](#).

The Submitting Author accepts and understands that any supply made under these terms is made by BMJ to the Submitting Author unless you are acting as an employee on behalf of your employer or a postgraduate student of an affiliated institution which is paying any applicable article publishing charge ("APC") for Open Access articles. Where the Submitting Author wishes to make the Work available on an Open Access basis (and intends to pay the relevant APC), the terms of reuse of such Open Access shall be governed by a Creative Commons licence – details of these licences and which [Creative Commons](#) licence will apply to this Work are set out in our licence referred to above.

Other than as permitted in any relevant BMJ Author's Self Archiving Policies, I confirm this Work has not been accepted for publication elsewhere, is not being considered for publication elsewhere and does not duplicate material already published. I confirm all authors consent to publication of this Work and authorise the granting of this licence.



1  
2  
3  
4 Vertebroplasty in multiple myeloma patients with vertebral compression fractures:  
5 Protocol for a single-blind randomized controlled trial.  
6  
7  
8  
9

10 Line Adsbøll Wickstrøm<sup>1</sup>, MD, Leah Y. Carreon, MD, MSc<sup>1,2</sup>,  
11 Thomas Lund, MD, PhD<sup>3</sup>, Niels Abildgaard, MD, DMSc<sup>3</sup>, Marianne Dyrby Lorenzen<sup>1</sup>, RN, MCN,  
12 Mikkel Ø. Andersen, MD<sup>1,2</sup>  
13  
14  
15  
16  
17

18 Author affiliations:  
19

- 20  
21 1. Spine Surgery & Research, Spinecenter of Southern Denmark, Lillebaelt HospitalMiddelfart  
22  
23 2. Department of Regional Health Research, Faculty of Health Services, University of Southern  
24 Denmark, Odense, Denmark  
25  
26 3. Department of Haematology, Odense University Hospital, Odense, Denmark  
27  
28  
29  
30  
31

32 Corresponding author:  
33

34 Line Adsbøll Wickstrøm, line.adsboll.wickstrom@rsyd.dk  
35  
36  
37  
38  
39  
40  
41  
42  
43  
44  
45  
46  
47  
48  
49  
50  
51  
52  
53  
54  
55  
56  
57  
58  
59  
60

Version 1.2 – 11.03.2021

**Abstract:****Introduction:**

Multiple myeloma is a plasma cell cancer where about 1/3 of the patients present with pathological fractures at the time of diagnosis. Despite treatment, the majority of the patients will develop additional fractures.

Because survival and prognosis has improved significantly over the last two decades for multiple myeloma (MM) patients, there is an increased need to focus on optimal fracture treatment. Traditionally, fracture pain is treated conservatively with opioids, bisphosphonates, bracing, and radiation therapy. Vertebral augmentation has been used the last three decades as a minimally invasive treatment option for vertebral compression fractures, but the evidence base for the efficacy is weak.

We describe a trial assessing the impact of vertebroplasty on clinical outcome in the treatment of MM patients with painful vertebral fractures.

**Methods:**

100 MM patients with painful vertebral fractures will be randomized in a prospective, single blinded, multicenter, clinical trial where patients are randomized to either usual care or usual care supplemented with vertebroplasty with a possibility of crossover 4 weeks after randomization. The primary outcome will be change in Oswestry Disability Index at 4 weeks.

**Analysis:**

Primary and secondary outcomes are assessed at baseline and at 4, 8, 26 and 52 weeks. Categorical data will be presented by means of frequencies and related percentages; continuous data will be displayed by means of descriptive statistics.

**Ethics and dissemination:**

The study has been evaluated by the Regional Committees on Health Research for Southern Denmark (S-20200075) and notified and approved by the Region of Southern Denmark and listed in the internal record, journal no. 20/22355. All participants provide consent. The protocol will follow the SPIRIT (Standard Protocol Items for Randomized Trials) statement. The Danish Myeloma Patient Organization supports the study. Findings will be disseminated in peer-reviewed publications and presented at national and international conferences. Trial registration number NCT04533217.

**Strengths and limitations of this study:***Strengths*

- Randomized controlled trial
- Nationwide study (participation of all hematologic departments in Denmark)

*Limitations*

- Single-blinded randomization

## Introduction:

Multiple myeloma is a plasma cell cancer in the bone marrow associated with activated osteoclastic bone degradation, lack of bone formation, and pathological fractures with protracted healing due to inhibited osteoblast function (1, 2). These biological changes are induced by the expansion of proliferating malignant plasma cells in the bone marrow (2).

The incidence is about 7 per 100,000 in Denmark, equivalent to approximately about 400 new cases a year (3). At the time of diagnosis pathological fractures are present in about 1/3 of the patients and a greater proportion develop fractures during the course of the disease (3, 4). The annual risk of spontaneous spinal fractures is 15-24 % despite bisphosphonate prophylaxis (3).

Although multiple myeloma is incurable, survival and prognosis has improved significantly over the last two decades (5). This justifies and necessitates increased focus on optimal fracture treatment to ensure good physical function and quality of life for the patients' remaining lifetime. Vertebral fractures are very painful and affect patients' daily function (2, 4, 6). Traditionally, the fracture pain is treated conservatively with opioids, bisphosphonates, bracing, and radiation therapy (3).

Vertebroplasty was first reported in the late 80s for the treatment of vertebral hemangiomas and osteolytic vertebral tumors (7). Under fluoroscopy, a Jamshidi needle is inserted through the pedicles (8) into the vertebral body. Polymethylmethacrylate is injected into the vertebral body, still under imaging guidance, to minimize extravasation into the spinal canal. Vertebral augmentation, including percutaneous vertebroplasty (PVP) and kyphoplasty (KP), has been used as a minimally invasive treatment option for vertebral compression fractures (VCFs) (4, 9, 10).

The procedure is considered to be well suited for treatment of patients with malignant spine disease as it can be done under local anaesthesia, provides rapid pain relief (11, 12), and prevents prolonged immobilization. PVP and KP provide stability within the fractured vertebral body by preventing microscopic movement and macroscopic collapse. It has also been suggested that polymethylmethacrylate (PMMA) bone cement induces exothermic reactions that are toxic to nerve endings and therefore provide pain relief (13).

Two randomized trials and a later review was published in 2009 (14, 15) and 2018 (16), respectively, regarding vertebral augmentation. The two trials were done in different patient populations, namely patients with benign osteoporosis. The disappointing outcome of these two trials has unfortunately led to uncertainties regarding the effect in other indications, such as metastatic disease.

In 2019, a systematic review on vertebral augmentation of cancer related painful vertebral lesions was published (12). This review included not only randomized studies, but also other publications involving vertebral augmentation techniques. In all 87 studies were included in the study and meta-analysis was performed. The review demonstrated clinically relevant improvement in pain and health related quality of life.

A recent Danish national clinical guideline (17, 18) on painful vertebral compression fractures, caused by cancer including multiple myeloma, recommends percutaneous vertebroplasty as pain management. The evidence is mainly based on two randomized studies: The CAFE study by Berenson et al. (19) including 49 patients suffering from multiple myeloma randomized between kyphoplasty and conservative treatment and the study by Audat et al. (20) randomizing 27 patients to either conventional therapy or conventional therapy adding vertebroplasty or kyphoplasty. The recommendations in the Danish guideline are weak due to risk of bias, including lack of blinding in randomized studies. In addition, the CAFE study was further

1  
2  
3  
4 downgraded for indirectness as the study contains a population consisting predominantly of patients with  
5 primary cancer other than multiple myeloma.  
6  
7

### 8 *Rationale for this study*

9  
10 Evidence-based guidelines for supplementing chemotherapy with vertebral augmentation when treating  
11 multiple myeloma patients with pathological fractures are lacking. The overall evidence from the two  
12 randomized controlled trials comparing supplementary vertebral augmentation to usual care is of low  
13 quality (17, 18) and requires more robust investigations regarding the role of vertebroplasty in the  
14 treatment algorithm of multiple myeloma with spinal involvement.  
15  
16

17 For that reason, we decided to perform a single blinded, randomized, controlled trial comparing usual care  
18 versus usual care supplemented with vertebroplasty in treating multiple myeloma patients with  
19 pathological fractures.  
20  
21  
22

### 23 **Methods and analysis:**

#### 24 *Purpose*

25  
26 To examine the efficacy of PVP in multiple myeloma patients with vertebral compression fracture, based on  
27 improvement in patient reported outcome  
28  
29

#### 30 *Patient and public involvement*

31  
32 The initial idea behind this project was created by a patient appointed by the Danish Cancer Society to  
33 participate in the working group behind the National Clinical Guideline on percutaneous vertebroplasty for  
34 the palliative treatment of malignant vertebral compression fractures caused by multiple myeloma (17, 18).  
35 She urged the group members to set up a study to provide high-quality evidence needed to recommend  
36 the treatment.  
37

38 The study design has been developed in collaboration with the Danish Myeloma Patients' Association  
39 "Dansk Myelomatose Forening".  
40

#### 41 *Study design*

42  
43 The study design is a randomized, prospective, single blinded, multicentre, clinical trial where patients are  
44 randomized to either usual care or usual care supplemented with vertebroplasty with a possibility of  
45 crossover 4 weeks after randomization. It is designed in accordance with the SPIRIT (Standard Protocol  
46 Items: Recommendations for Interventional Trials) guidelines (21).  
47

48 The trial design is illustrated in Figure 1 and trial timeline in Figure 2.  
49

#### 50 *Trial sites*

51  
52 The trial is a multi-centre trial with the participation of all Danish haematological departments. The  
53 departments are as follows:  
54

- 55 - Department of Haematology, Aalborg University Hospital
  - 56 - Department of Haematology, Aarhus University Hospital
  - 57 - Department of Haematology, Holstebro Regional Hospital
  - 58 - Department of Haematology, University Hospital of Southern Denmark, Esbjerg
- 59  
60

- Department of Haematology, University Hospital of Southern Denmark, Vejle
- Department of Haematology, Zealand University Hospital, Roskilde
- Department of Haematology, Herlev Hospital
- Department of Haematology, Rigshospitalet, Copenhagen
- Department of Haematology, Odense University Hospital

Participating spine surgical units are as follows:

- Department of Orthopaedic Surgery, Rigshospitalet
- Spine Center of Southern Denmark, Lillebaelt Hospital, Middelfart
- Department of Orthopaedic Surgery, Aarhus University Hospital

### *Study population*

Study subjects will be recruited from patients diagnosed with multiple myeloma assessed and found eligible for vertebroplasty due to painful vertebral compression fractures. Possible candidates will be identified at the departments of haematology where the patients are treated for their disease.

### *Inclusion criteria:*

- Patients diagnosed with symptomatic multiple myeloma and spinal compression fractures
- Fractures verified on MRI- or CT-scan (OF-type 1-4) between and including Th6 and L5
- Fracture involves 4 vertebral body levels or less
- PVP can be done in one session
- Possible indication for vertebroplasty
- Back pain score measured on a visual analogue scale (VAS)  $\geq 5$
- Age  $\geq 18$  years
- Able to understand and read Danish
- Written informed consent
- Relevant pain started  $\leq 3$  months prior to inclusion

### *Exclusion criteria:*

- Contra-indications for spine surgery:
  - o Platelets  $< 30$  mia/l
  - o OF-type 5 and Pincer-type
- Bedridden
- Presence of neurologic deficit
- Psychological or psychiatric disorder that is expected to interfere with compliance

### *Randomization:*

Prior to randomization, the patients will be divided into two groups, stratifying between patients with known multiple myeloma with a newly diagnosed spinal fracture and relevant pain  $\leq 3$  months prior to inclusion and patients with newly diagnosed multiple myeloma with relevant pain associated to a spine fracture initiating  $\leq 3$  months prior to the diagnosis.

1  
2  
3  
4 Furthermore, to ensure balanced control and intervention groups the included patients at randomization  
5 will be stratified according to 1) planned PVP of 1 vs. 2-4 levels, and 2) former vertebral fractures that are  
6 not planned treated with PVP.  
7  
8  
9

10 The patients in each subgroup will be randomized to one of two parallel treatment arms allocated in a 1:1  
11 ratio. Sealed numbered envelopes containing electronically randomized group allocations will be prepared  
12 prior to trial commencement. Following informed consent, a sealed pre-randomized envelope will be  
13 allocated by the study nurse and the patient label affixed to the envelope.  
14  
15

#### 16 *Control Treatment*

17  
18 The patients will receive the treating departments' standard care, following the Danish National Guidelines  
19 (22).  
20

#### 21 *Investigational treatment:*

22  
23 The investigational treatment arm will be the group receiving supplementary vertebroplasty of the  
24 vertebral compression fractures.  
25

#### 26 *Outcomes*

27  
28 Primary outcome:

- 29 • Back-specific Functional Status using Oswestry Disability Index (ODI) at time of randomization and  
30 4-weeks post-randomization. The ODI assesses pain-related physical functioning in spinal disorders.  
31 (23). The ODI contains 10 questions about how back pain affects the ability to manage everyday  
32 life. These are summarized in a score ranging from 0 to 100. Higher scores reflect worse pain and  
33 disability.  
34  
35

36  
37 *Secondary outcomes:*

- 38 • Self-reported average pain intensity (VAS) during the preceding 24 hours at enrolment, and weekly  
39 in 12 weeks after enrolment. The rating scale from 0 to 10, with higher scores indicating more  
40 severe pain.  
41
- 42 • Health Related Quality of Life (HRQL) on the EuroQol 5-dimension 3-level (EQ-5D-3L) (24). EQ-5D-3L  
43 is a widely used generic measure of HRQL. It evaluates five dimensions: mobility, self-care, usual  
44 activities, pain/discomfort and anxiety/depression, each with three levels of severity. The resulting  
45 health is converted into a single summary index with a total score ranging from -0.6 to 1, where 1  
46 corresponds to perfect health.  
47
- 48 • HRQL according to the FACT-G, EORTC QLQ C30 and MY20 questionnaires.
- 49 • Long-term stability of the treated vertebral bone (e.g., fracture, including re-fracture, vertebral  
50 body height, or malalignment) as measures by long-standing radiographs.
- 51 • Questionnaire about general health services, including questions about e.g. sick leave and home  
52 care.  
53  
54

55  
56 *Data collection:*

57  
58 After informed consent is obtained from the patient, the hematologist will fill out screening forms  
59 regarding disease stage, lines of treatment, current disease status, bisphosphonate status, and pain relief  
60

1  
2  
3  
4 treatment. The patient will complete surveys including the ODI, VAS pain score and QoL. Time points for  
5 data collection is presented in Table 1.  
6

#### 7 *Sample size*

8  
9 The sample size calculations for this study is a challenge, as there are very few published papers reporting  
10 outcomes following vertebroplasty on vertebral fractures due to multiple myeloma. The sample size  
11 calculations are thus based on results from treating osteoporotic vertebral fractures with vertebroplasty. To  
12 obtain a minimal clinically relevant improvement of at least 15 points on the Oswestry Disability Index, we  
13 need to enrol 44 patients in each group. To account for approximately 10 % dropout we aim to enroll 100  
14 patients.  
15

$$16 N = (Z(\text{crit}) + Z(\text{pwr})) \times s^2 \times 2 / \text{MIREDF}^2,$$

17  
18 with a mean minimum difference between groups of 15, SD=25, two tailed p=0.05, assuming a normal  
19 distribution with Z (crit)=1.96, Z (pwr)=0.80  
20

#### 21 *Analyses:*

##### 22 *Baseline characteristics:*

23  
24 The baseline characteristics of patients and operative details including complications will be recorded.  
25

##### 26 *Statistical analysis:*

27  
28 Data will be analyzed according to their type using STATA, i.e.; categorical data will be presented by means  
29 of frequencies and related percentages; continuous data will be displayed by means of descriptive statistics  
30 (mean, standard deviation, number of observations, minimum, median, maximum).  
31

32  
33 The primary outcome measure will be improvement in ODI scores at 4 weeks after initiation of treatment.  
34 Repeated measures ANCOVA with baseline ODI, VAS pain, EQ-5D-3L, and number of levels involved will be  
35 performed.  
36

##### 37 *Ethics and dissemination:*

38  
39 The study will be performed according to the Declaration of Helsinki and the Danish Code of Conduct for  
40 Research Integrity (25). The study has been evaluated by the Regional Committees on Health Research for  
41 Southern Denmark (S-20200075) and has been notified to and approved by the Region of Southern  
42 Denmark and listed in the internal record, journal no. 20/22355, and permission to extract data from  
43 hospital records will be obtained from the patients. Consent to use patient-reported information from the  
44 DaneSpine database is obtained electronically prior to patients completing the questionnaires. Patients  
45 who do not consent will not be included.  
46

47  
48 Findings will be disseminated in peer-reviewed publications and presented at national and international  
49 conferences following guidance from the SPIRIT guidelines.  
50

#### 51 **Discussion:**

52  
53 This article presents a protocol for a single blinded randomized controlled trial comparing usual care versus  
54 usual care supplemented with vertebroplasty in treating multiple myeloma patients with painful vertebral  
55  
56  
57  
58  
59  
60

fractures. Further prospectively registered data on health, social variables and patient-reported outcomes are collected.

As the median survival is significantly better for MM patients than for patients with spinal metastases associated with solid cancers it justifies and necessitates increased focus on optimal fracture treatment in MM patients specifically. An increasing number of MM patients experience more than 5 years, even more than 10 years survival, which highlights the importance of ensuring good physical function and quality of life for the patients.

The outcome of the proposed project will impact future national and international guidelines on the treatment regimen for patients with multiple myeloma and vertebral fractures.

The main strength of this study is the randomized treatment assignments, reducing the risk of selection bias.

#### **Author contributorship statement and conflict of interest:**

- Line Adsbøll Wickstrøm: PhD student, investigator
- Leah Y. Carreon: Co-supervisor
- Thomas Lund: Consultant, mediation of contact to the Danish Myeloma Patients' Association "Dansk Myelomatose Forening"
- Niels Abildgaard: Co-supervisor, mediation of contact to the Danish hematologic departments
- Marianne Dyrby Lorenzen: Administration
- Mikkel Ø. Andersen: Principal supervisor

All authors have participated in the design and organization of the study. Authors have no affiliation apart from stated, and have no conflicts of interests.

#### **Funding:**

Expences, including salary, tuition fees and miscellaneous is applied for from the following:

- Faculty of Health Sciences, University of Southern Denmark
- Research means, Region of Southern Denmark or Hospital Lillebaelt Research Committee
- External funding

No funding has yet been collected.

#### **Datasharing:**

When the project is terminated, data from the project database will be archived at the Danish National Archives, and the research group will save an anonymized version of patient information



1  
2  
3  
4 from the database. After the project results are published, interested researchers will have two  
5 options for re-use of the data: upon receiving required permits they may apply for data extracts  
6 from DaneSpine and from the Danish National Archives – or they may receive anonymized raw  
7 data from DaneSpine and the project data base from us. This way, data will  
8 be Findable, Accessible, Interoperable and Reusable.  
9  
10  
11

## 12 **References**

- 14 1. Bataille R. et al. "The multiple myeloma bone eco-system and its relation to oncogenesis"  
15 *Morphologie*. 2015 Jun;99(325):31-7. doi: 10.1016/j.morpho.2015.03.002.  
16
- 17 2. Thorsteinsdottir S. et al. "Fractures and survival in multiple myeloma: results from a  
18 population-based study". *Haematologica*. 2019. Dec 2. pii: haematol.2019.230011. doi:  
19 10.3324/haematol.2019.230011.  
20
- 21 3. Simony A. et al. "Pain reduction after percutaneous vertebroplasty for myeloma-associated  
22 vertebral fractures". *Danish Medical Journal*. 2014. Dec;61(12):A4945.  
23
- 24 4. Kyriakou C. et al. "The role of cement augmentation with percutaneous vertebroplasty and  
25 balloon kyphoplasty for the treatment of vertebral compression fractures in multiple  
26 myeloma: a consensus statement from the International Myeloma Working Group  
27 (IMWG)". *Blood Cancer Journal*. 2019. Feb 26;9(3):27. doi: 10.1038/s41408-019-0187-7.  
28
- 29 5. Gregersen H. et al. "The impact of comorbidity on mortality in multiple myeloma: a Danish  
30 nationwide population-based study". *Cancer Medicine*. 2017. Jul;6(7):1807-1816. doi:  
31 10.1002/cam4.1128.  
32
- 33 6. Hall S.E. "A case-control study of quality of life and functional impairment in women with  
34 long standing vertebral osteoporotic fracture". *Osteoporosis International*. 1999;9(6): 508-  
35 15.  
36
- 37 7. Galibert P, et al. Preliminary note on the treatment of vertebral angioma by percutaneous  
38 acrylic vertebroplasty. *Neurochirurgie* 1987;33:166–8.  
39
- 40 8. Zoarski GH, et al. Percutaneous vertebroplasty: A to Z. *Tech Vasc Interv Radiol* 2002;5:223–  
41 38.  
42
- 43 9. Malhotra K. et al. "Spinal disease in myeloma: cohort analysis at a specialist spinal surgery  
44 centre indicates benefit of early surgical augmentation or bracing". *BMC Cancer*. 2016. Jul  
45 11;16:444. doi: 10.1186/s12885-016-2495-7.  
46
- 47 10. Nas Ö. F. "Effectiveness of percutaneous vertebroplasty in patients with multiple myeloma  
48 having vertebral pain". *Diagnostic and Interventional Radiology*. 2016. May-Jun;22(3):263-  
49 8. doi: 10.5152/dir.2016.15201.  
50  
51  
52  
53  
54  
55  
56  
57  
58  
59  
60

11. Patel M. S. et al: "Evaluating Treatment Strategies for Spinal Lesions in Multiple Myeloma: A Review of the Literature". *International Journal of Spine Surgery*. 2018. Oct 15;12(5):571-581. doi: 10.14444/5070.
12. Sørensen S. T. et al.: "Vertebroplasty or kyphoplasty as palliative treatment for cancer-related vertebral compression fractures: a systematic review". *Spine Journal*. 2019. Jun;19(6):1067-1075. doi: 10.1016/j.spinee.2019.02.012.
13. CG, et al. CT fluoroscopy-guided percutaneous vertebroplasty for the treatment of osteolytic breast cancer metastases: results in 62 sessions with 86 vertebrae treated. *J Vasc Interv Radiol* 2008;19:1596–606.
14. Buchbinder R. et al. A randomized trial of vertebroplasty for painful osteoporotic vertebral fractures. *The New England journal of medicine*. 2009;361(6):557-68.
15. Kallmes DF. et al. A randomized trial of vertebroplasty for osteoporotic spinal fractures. *The New England journal of medicine*. 2009;361(6):569-79
16. Buchbinder R. et al. Percutaneous vertebroplasty for osteoporotic vertebral compression fracture. *Cochrane Database Syst Rev* 2018;4:CD006349.
17. <http://drks.ortopaedi.dk/nkr-for-perkutan-vertebroplastik-til-palliativ-behandling-af-maligne-sammenfald-i-ryggen/>
18. Rousing R, Kirkegaard AO, Nielsen M, Holtved E, Sørensen LH, Lund T, Olesen V, Andersen MØ. Percutaneous vertebroplasty as treatment of malignant vertebral lesions: a systematic review and GRADE evaluation resulting in a Danish national clinical guideline. *Eur Spine J*. 2020 Apr 3. doi: 10.1007/s00586-020-06392-w. [Epub ahead of print] Review. PubMed PMID: 32246231.
19. Berenson J. et al. "Balloon kyphoplasty versus non-surgical fracture management for treatment of painful vertebral body compression fractures in patients with cancer: a multicentre, randomised controlled trial". *Lancet Oncology*. 2011. Mar;12(3):225-35. doi: 10.1016/S1470-2045(11)70008-0.
20. Audat Z. A. et al. "Comparison if the addition of multilevel vertebral augmentation to conventional therapy will improve the outcome of patients with multiple myeloma". *Scoliosis Spinal Disorder*. 2016. Dec 29;11:47. doi: 10.1186/s13013-016-0107-6.
21. <https://www.spirit-statement.org/publications-downloads/>, assed 2020-03-23
22. [https://www.sst.dk/-/media/Udgivelser/2019/Pakkeforloeb-kraeft-2015-2019/Myelomatose-2016/Pakkeforl%C3%B8b-for-myelomatose-%E2%80%93-revision-sep-2016\\_endelig.ashx?la=da&hash=45E5D966276C45B1DEC5B9D4749CE98E37B3EC0A](https://www.sst.dk/-/media/Udgivelser/2019/Pakkeforloeb-kraeft-2015-2019/Myelomatose-2016/Pakkeforl%C3%B8b-for-myelomatose-%E2%80%93-revision-sep-2016_endelig.ashx?la=da&hash=45E5D966276C45B1DEC5B9D4749CE98E37B3EC0A), accessed 2021-03-11

23. Fairbank JC , Pynsent PB . The Oswestry Disability Index. Spine 2000;25:2940–53.doi:10.1097/00007632-200011150-00017
24. Obradovic M. et al. Validity and responsiveness of EuroQol-5 dimension (EQ-5D) versus Short Form-6 dimension (SF-6D) questionnaire in chronic pain. Health Qual Life Outcomes 2013;11:110.doi:10.1186/1477-7525-11-110
25. The Danish Code of Conduct for Research Integrity — Uddannelses- og Forskningsministeriet. <http://ufm.dk/publikationer/2014/the-danish-code-of-conduct-for-research-integrity>

Tabel 1 Datacollection - timeline

| Clinical tools   | At incl. | 1 week post-incl. | 2 w | 3 w | 4 w | 5 w | 6 w | 7 w | 8 w | 9 w | 10 w | 11 w | 12 w | 26 w | 52 w |
|------------------|----------|-------------------|-----|-----|-----|-----|-----|-----|-----|-----|------|------|------|------|------|
| ODI              | x        |                   |     |     | x   |     |     |     | x   |     |      |      |      | x    | x    |
| VAS leg and back | x        | x                 | x   | x   | x   | x   | x   | x   | x   | x   | x    | x    | x    | x    | x    |
| EQ-5D            | x        |                   |     |     | x   |     |     |     | x   |     |      |      |      | x    | x    |
| FACT-G           | x        |                   |     |     |     |     |     |     |     |     |      |      | x    |      | x    |
| EORTC QLQ-C30    | x        |                   |     |     |     |     |     |     |     |     |      |      | x    |      | x    |
| EORTC QLQ-MY20   | x        |                   |     |     |     |     |     |     |     |     |      |      | x    |      | x    |



1  
2  
3  
4 First thank you for the opportunity to revise our manuscript and secondly to the reviewers for their  
5 time and good suggestions to improve the paper and trial.  
6

7 *Reviewer: 1*

8  
9 *Dr. Andrés Romero, National Cancer Institute Mexico City*

10  
11 *Comments to the Author:*

12  
13 *First, excellent paper. I would recommend following complications like the risk of new fractures (already*  
14 *described for myeloma patients) and explain the usual care your patients are receiving (especially*  
15 *radiotherapy) because of the crossover*

16  
17 It is our intention to record any complications such as re-fractures and complications related to the  
18 surgical procedure. This has been clarified in the paper.

19  
20 The usual care is following the Danish national guidelines. Reference has been added to the paper.  
21 This reference includes recommendations concerning radiotherapy.

22  
23 *Reviewer: 2*

24  
25 *Dr. Reade De Leacy, Icahn School of Medicine at Mount Sinai*

26  
27 *Comments to the Author:*

28  
29 *I have some concerns regarding the enrollment numbers calculated. The authors admit that they had*  
30 *difficulty identifying an appropriate number of enrollments and have based the calculation derived*  
31 *osteoporotic compression fracture literature which is a clearly different disease process and may influence*  
32 *outcomes. This seems like a concerning assumption upon which to based an important study. Both of the*  
33 *2009 papers were dramatically underpowered to show a treatment effect with their enrollment targets and*  
34 *amongst other issues led to both of these papers also being downgraded to Level 2 evidence. I hope that this*  
35 *has been taken into account when planning this important study.*

36  
37 The power calculation has been a major concern, as it would be a disaster to conduct a nationwide  
38 RCT supported by the Danish National Health Board and end up with inconclusive results.

39  
40 We agree with the reviewer regarding the two 2009 papers. In these papers, there were many issues  
41 concerning the inclusion of patients such as enrolling patients with fractures up to 12 months'  
42 duration, including patients without MRI and VAS-scores as low as three.

43  
44 The power calculation in the present study is based on results in a mixed osteoporotic and malignant  
45 population published in the annual reports from DaneSpine, the Danish National Spine database  
46 (<http://drks.ortopaedi.dk/wp-content/uploads/2020/06/%C3%85rsrapport-DRKS-2019-version-3.0-1.pdf>)  
47 and results likewise based on DaneSpine regarding results treating mixed malignant patients  
48 (Dan Med J 2018;65(10):A5509). We firmly believe the present study is adequately powered.

49  
50  
51 *There is no description of the inclusion criteria for the type of compression fracture in terms of AO, Gennant*  
52 *or Magerl classification or the degree of height loss of the target vertebral body tolerated at presentation.*  
53 *Furthermore including patient with chronic compression fractures out to 3 months adds heterogeneity to the*  
54 *patient population which we have seen in prior augmentation trials and further concerns me regarding*  
55 *powering for the primary outcome. Are patients to be excluded with baseline LBP or spondylosis or a history*  
56 *of prior back surgery ???*  
57  
58  
59  
60

1  
2  
3  
4  
5  
6  
7  
8  
9  
10  
11  
12  
13  
14  
15  
16  
17  
18  
19  
20  
21  
22  
23  
24  
25  
26  
27  
28  
29  
30  
31  
32  
33  
34  
35  
36  
37  
38  
39  
40  
41  
42  
43  
44  
45  
46  
47  
48  
49  
50  
51  
52  
53  
54  
55  
56  
57  
58  
59  
60

When classifying the fractures in the present study we use the osteoporotic fracture classification (OF classification), this has been clarified in the paper.

We understand the reviewer's concerns about including patients with chronic compression fractures out to 3 months is relevant. However, this is more relevant when treating osteoporotic fractures as one expects spontaneous healing in contrast to malignant lesions. By only including patients diagnosed with symptomatic multiple myeloma and a back pain score measured on a visual analogue scale (VAS)  $\geq 5$  we believe the cohort in the present study is homogenous.

Previous spine surgery is not a contra indication for inclusion and as stated in the inclusion criteria relevant pain started  $\leq 3$  months prior to inclusion excludes severe preexisting spine pathology.

*This is an important question and could be a valuable trial. More clarity on its design and refining the inclusion and exclusion criteria to identify a more mechanically homogenous patient population upon which to test this important hypothesis is needed.*

The inclusion and exclusion criteria have been clarified.

# Reporting checklist for protocol of a clinical trial.

Based on the SPIRIT guidelines.

## Instructions to authors

Complete this checklist by entering the page numbers from your manuscript where readers will find each of the items listed below.

Your article may not currently address all the items on the checklist. Please modify your text to include the missing information. If you are certain that an item does not apply, please write "n/a" and provide a short explanation.

Upload your completed checklist as an extra file when you submit to a journal.

In your methods section, say that you used the SPIRIT reporting guidelines, and cite them as:

Chan A-W, Tetzlaff JM, Gøtzsche PC, Altman DG, Mann H, Berlin J, Dickersin K, Hróbjartsson A, Schulz KF, Parulekar WR, Krleža-Jerić K, Laupacis A, Moher D. SPIRIT 2013 Explanation and Elaboration: Guidance for protocols of clinical trials. *BMJ*. 2013;346:e7586

|                                             |                     | Reporting Item                                                                                               | Page Number |
|---------------------------------------------|---------------------|--------------------------------------------------------------------------------------------------------------|-------------|
| <b>Administrative information</b>           |                     |                                                                                                              |             |
| Title                                       | <a href="#">#1</a>  | Descriptive title identifying the study design, population, interventions, and, if applicable, trial acronym | 1           |
| Trial registration                          | <a href="#">#2a</a> | Trial identifier and registry name. If not yet registered, name of intended registry                         | 2           |
| Trial registration: data set                | <a href="#">#2b</a> | All items from the World Health Organization Trial Registration Data Set                                     | 2           |
| Protocol version                            | <a href="#">#3</a>  | Date and version identifier                                                                                  | 1           |
| Funding                                     | <a href="#">#4</a>  | Sources and types of financial, material, and other support                                                  | 8           |
| Roles and responsibilities: contributorship | <a href="#">#5a</a> | Names, affiliations, and roles of protocol contributors                                                      | 1, 8        |

|    |                           |                     |                                                              |     |
|----|---------------------------|---------------------|--------------------------------------------------------------|-----|
| 1  | Roles and                 | <a href="#">#5b</a> | Name and contact information for the trial sponsor           | n/a |
| 2  | responsibilities:         |                     |                                                              |     |
| 3  | sponsor contact           |                     |                                                              |     |
| 4  | information               |                     |                                                              |     |
| 5  |                           |                     |                                                              |     |
| 6  |                           |                     |                                                              |     |
| 7  |                           |                     |                                                              |     |
| 8  | Roles and                 | <a href="#">#5c</a> | Role of study sponsor and funders, if any, in study design;  | n/a |
| 9  | responsibilities:         |                     | collection, management, analysis, and interpretation of      |     |
| 10 | sponsor and funder        |                     | data; writing of the report; and the decision to submit the  |     |
| 11 |                           |                     | report for publication, including whether they will have     |     |
| 12 |                           |                     | ultimate authority over any of these activities              |     |
| 13 |                           |                     |                                                              |     |
| 14 |                           |                     |                                                              |     |
| 15 |                           |                     |                                                              |     |
| 16 |                           |                     |                                                              |     |
| 17 | Roles and                 | <a href="#">#5d</a> | Composition, roles, and responsibilities of the coordinating | n/a |
| 18 | responsibilities:         |                     | centre, steering committee, endpoint adjudication            |     |
| 19 | committees                |                     | committee, data management team, and other individuals       |     |
| 20 |                           |                     | or groups overseeing the trial, if applicable (see Item 21a  |     |
| 21 |                           |                     | for data monitoring committee)                               |     |
| 22 |                           |                     |                                                              |     |
| 23 |                           |                     |                                                              |     |
| 24 |                           |                     |                                                              |     |
| 25 | <b>Introduction</b>       |                     |                                                              |     |
| 26 |                           |                     |                                                              |     |
| 27 |                           |                     |                                                              |     |
| 28 | Background and            | <a href="#">#6a</a> | Description of research question and justification for       | 3-4 |
| 29 | rationale                 |                     | undertaking the trial, including summary of relevant         |     |
| 30 |                           |                     | studies (published and unpublished) examining benefits       |     |
| 31 |                           |                     | and harms for each intervention                              |     |
| 32 |                           |                     |                                                              |     |
| 33 |                           |                     |                                                              |     |
| 34 |                           |                     |                                                              |     |
| 35 | Background and            | <a href="#">#6b</a> | Explanation for choice of comparators                        | n/a |
| 36 | rationale: choice of      |                     |                                                              |     |
| 37 | comparators               |                     |                                                              |     |
| 38 |                           |                     |                                                              |     |
| 39 |                           |                     |                                                              |     |
| 40 | Objectives                | <a href="#">#7</a>  | Specific objectives or hypotheses                            | n/a |
| 41 |                           |                     |                                                              |     |
| 42 |                           |                     |                                                              |     |
| 43 | Trial design              | <a href="#">#8</a>  | Description of trial design including type of trial (eg,     | 4   |
| 44 |                           |                     | parallel group, crossover, factorial, single group),         |     |
| 45 |                           |                     | allocation ratio, and framework (eg, superiority,            |     |
| 46 |                           |                     | equivalence, non-inferiority, exploratory)                   |     |
| 47 |                           |                     |                                                              |     |
| 48 |                           |                     |                                                              |     |
| 49 |                           |                     |                                                              |     |
| 50 | <b>Methods:</b>           |                     |                                                              |     |
| 51 | <b>Participants,</b>      |                     |                                                              |     |
| 52 | <b>interventions, and</b> |                     |                                                              |     |
| 53 | <b>outcomes</b>           |                     |                                                              |     |
| 54 |                           |                     |                                                              |     |
| 55 |                           |                     |                                                              |     |
| 56 |                           |                     |                                                              |     |
| 57 | Study setting             | <a href="#">#9</a>  | Description of study settings (eg, community clinic,         | 4-5 |
| 58 |                           |                     | academic hospital) and list of countries where data will be  |     |
| 59 |                           |                     |                                                              |     |
| 60 |                           |                     |                                                              |     |



collected. Reference to where list of study sites can be obtained

|    |                      |                      |                                                                                                                                                                                                                                                                                                                                                                                |
|----|----------------------|----------------------|--------------------------------------------------------------------------------------------------------------------------------------------------------------------------------------------------------------------------------------------------------------------------------------------------------------------------------------------------------------------------------|
| 1  |                      |                      |                                                                                                                                                                                                                                                                                                                                                                                |
| 2  |                      |                      |                                                                                                                                                                                                                                                                                                                                                                                |
| 3  |                      |                      |                                                                                                                                                                                                                                                                                                                                                                                |
| 4  | Eligibility criteria | <a href="#">#10</a>  | Inclusion and exclusion criteria for participants. If applicable, eligibility criteria for study centres and individuals who will perform the interventions (eg, surgeons, psychotherapists)                                                                                                                                                                                   |
| 5  |                      |                      | 5                                                                                                                                                                                                                                                                                                                                                                              |
| 6  |                      |                      |                                                                                                                                                                                                                                                                                                                                                                                |
| 7  |                      |                      |                                                                                                                                                                                                                                                                                                                                                                                |
| 8  |                      |                      |                                                                                                                                                                                                                                                                                                                                                                                |
| 9  |                      |                      |                                                                                                                                                                                                                                                                                                                                                                                |
| 10 |                      |                      |                                                                                                                                                                                                                                                                                                                                                                                |
| 11 | Interventions:       | <a href="#">#11a</a> | Interventions for each group with sufficient detail to allow replication, including how and when they will be administered                                                                                                                                                                                                                                                     |
| 12 | description          |                      | 5-6                                                                                                                                                                                                                                                                                                                                                                            |
| 13 |                      |                      |                                                                                                                                                                                                                                                                                                                                                                                |
| 14 |                      |                      |                                                                                                                                                                                                                                                                                                                                                                                |
| 15 |                      |                      |                                                                                                                                                                                                                                                                                                                                                                                |
| 16 |                      |                      |                                                                                                                                                                                                                                                                                                                                                                                |
| 17 | Interventions:       | <a href="#">#11b</a> | Criteria for discontinuing or modifying allocated interventions for a given trial participant (eg, drug dose change in response to harms, participant request, or improving / worsening disease)                                                                                                                                                                               |
| 18 | modifications        |                      | 5-6                                                                                                                                                                                                                                                                                                                                                                            |
| 19 |                      |                      |                                                                                                                                                                                                                                                                                                                                                                                |
| 20 |                      |                      |                                                                                                                                                                                                                                                                                                                                                                                |
| 21 |                      |                      |                                                                                                                                                                                                                                                                                                                                                                                |
| 22 |                      |                      |                                                                                                                                                                                                                                                                                                                                                                                |
| 23 |                      |                      |                                                                                                                                                                                                                                                                                                                                                                                |
| 24 | Interventions:       | <a href="#">#11c</a> | Strategies to improve adherence to intervention protocols, and any procedures for monitoring adherence (eg, drug tablet return; laboratory tests)                                                                                                                                                                                                                              |
| 25 | adherence            |                      | n/a                                                                                                                                                                                                                                                                                                                                                                            |
| 26 |                      |                      |                                                                                                                                                                                                                                                                                                                                                                                |
| 27 |                      |                      |                                                                                                                                                                                                                                                                                                                                                                                |
| 28 |                      |                      |                                                                                                                                                                                                                                                                                                                                                                                |
| 29 | Interventions:       | <a href="#">#11d</a> | Relevant concomitant care and interventions that are permitted or prohibited during the trial                                                                                                                                                                                                                                                                                  |
| 30 | concomitant care     |                      | n/a                                                                                                                                                                                                                                                                                                                                                                            |
| 31 |                      |                      |                                                                                                                                                                                                                                                                                                                                                                                |
| 32 |                      |                      |                                                                                                                                                                                                                                                                                                                                                                                |
| 33 | Outcomes             | <a href="#">#12</a>  | Primary, secondary, and other outcomes, including the specific measurement variable (eg, systolic blood pressure), analysis metric (eg, change from baseline, final value, time to event), method of aggregation (eg, median, proportion), and time point for each outcome. Explanation of the clinical relevance of chosen efficacy and harm outcomes is strongly recommended |
| 34 |                      |                      | 6                                                                                                                                                                                                                                                                                                                                                                              |
| 35 |                      |                      |                                                                                                                                                                                                                                                                                                                                                                                |
| 36 |                      |                      |                                                                                                                                                                                                                                                                                                                                                                                |
| 37 |                      |                      |                                                                                                                                                                                                                                                                                                                                                                                |
| 38 |                      |                      |                                                                                                                                                                                                                                                                                                                                                                                |
| 39 |                      |                      |                                                                                                                                                                                                                                                                                                                                                                                |
| 40 |                      |                      |                                                                                                                                                                                                                                                                                                                                                                                |
| 41 |                      |                      |                                                                                                                                                                                                                                                                                                                                                                                |
| 42 |                      |                      |                                                                                                                                                                                                                                                                                                                                                                                |
| 43 |                      |                      |                                                                                                                                                                                                                                                                                                                                                                                |
| 44 |                      |                      |                                                                                                                                                                                                                                                                                                                                                                                |
| 45 | Participant timeline | <a href="#">#13</a>  | Time schedule of enrolment, interventions (including any run-ins and washouts), assessments, and visits for participants. A schematic diagram is highly recommended (see Figure)                                                                                                                                                                                               |
| 46 |                      |                      | 12, 14                                                                                                                                                                                                                                                                                                                                                                         |
| 47 |                      |                      |                                                                                                                                                                                                                                                                                                                                                                                |
| 48 |                      |                      |                                                                                                                                                                                                                                                                                                                                                                                |
| 49 |                      |                      |                                                                                                                                                                                                                                                                                                                                                                                |
| 50 |                      |                      |                                                                                                                                                                                                                                                                                                                                                                                |
| 51 |                      |                      |                                                                                                                                                                                                                                                                                                                                                                                |
| 52 | Sample size          | <a href="#">#14</a>  | Estimated number of participants needed to achieve study objectives and how it was determined, including clinical and statistical assumptions supporting any sample size calculations                                                                                                                                                                                          |
| 53 |                      |                      | 6-7                                                                                                                                                                                                                                                                                                                                                                            |
| 54 |                      |                      |                                                                                                                                                                                                                                                                                                                                                                                |
| 55 |                      |                      |                                                                                                                                                                                                                                                                                                                                                                                |
| 56 |                      |                      |                                                                                                                                                                                                                                                                                                                                                                                |
| 57 |                      |                      |                                                                                                                                                                                                                                                                                                                                                                                |
| 58 |                      |                      |                                                                                                                                                                                                                                                                                                                                                                                |
| 59 |                      |                      |                                                                                                                                                                                                                                                                                                                                                                                |
| 60 |                      |                      |                                                                                                                                                                                                                                                                                                                                                                                |

|    |                           |                      |                                                                                                                                                                                                                                                                                                                                                          |     |
|----|---------------------------|----------------------|----------------------------------------------------------------------------------------------------------------------------------------------------------------------------------------------------------------------------------------------------------------------------------------------------------------------------------------------------------|-----|
| 1  | Recruitment               | <a href="#">#15</a>  | Strategies for achieving adequate participant enrolment to reach target sample size                                                                                                                                                                                                                                                                      | n/a |
| 2  |                           |                      |                                                                                                                                                                                                                                                                                                                                                          |     |
| 3  |                           |                      |                                                                                                                                                                                                                                                                                                                                                          |     |
| 4  |                           |                      |                                                                                                                                                                                                                                                                                                                                                          |     |
| 5  | <b>Methods:</b>           |                      |                                                                                                                                                                                                                                                                                                                                                          |     |
| 6  | <b>Assignment of</b>      |                      |                                                                                                                                                                                                                                                                                                                                                          |     |
| 7  | <b>interventions (for</b> |                      |                                                                                                                                                                                                                                                                                                                                                          |     |
| 8  | <b>controlled trials)</b> |                      |                                                                                                                                                                                                                                                                                                                                                          |     |
| 9  |                           |                      |                                                                                                                                                                                                                                                                                                                                                          |     |
| 10 |                           |                      |                                                                                                                                                                                                                                                                                                                                                          |     |
| 11 |                           |                      |                                                                                                                                                                                                                                                                                                                                                          |     |
| 12 | Allocation: sequence      | <a href="#">#16a</a> | Method of generating the allocation sequence (eg, computer-generated random numbers), and list of any factors for stratification. To reduce predictability of a random sequence, details of any planned restriction (eg, blocking) should be provided in a separate document that is unavailable to those who enrol participants or assign interventions | 5-6 |
| 13 | generation                |                      |                                                                                                                                                                                                                                                                                                                                                          |     |
| 14 |                           |                      |                                                                                                                                                                                                                                                                                                                                                          |     |
| 15 |                           |                      |                                                                                                                                                                                                                                                                                                                                                          |     |
| 16 |                           |                      |                                                                                                                                                                                                                                                                                                                                                          |     |
| 17 |                           |                      |                                                                                                                                                                                                                                                                                                                                                          |     |
| 18 |                           |                      |                                                                                                                                                                                                                                                                                                                                                          |     |
| 19 |                           |                      |                                                                                                                                                                                                                                                                                                                                                          |     |
| 20 |                           |                      |                                                                                                                                                                                                                                                                                                                                                          |     |
| 21 |                           |                      |                                                                                                                                                                                                                                                                                                                                                          |     |
| 22 |                           |                      |                                                                                                                                                                                                                                                                                                                                                          |     |
| 23 |                           |                      |                                                                                                                                                                                                                                                                                                                                                          |     |
| 24 | Allocation                | <a href="#">#16b</a> | Mechanism of implementing the allocation sequence (eg, central telephone; sequentially numbered, opaque, sealed envelopes), describing any steps to conceal the sequence until interventions are assigned                                                                                                                                                | 5-6 |
| 25 | concealment               |                      |                                                                                                                                                                                                                                                                                                                                                          |     |
| 26 | mechanism                 |                      |                                                                                                                                                                                                                                                                                                                                                          |     |
| 27 |                           |                      |                                                                                                                                                                                                                                                                                                                                                          |     |
| 28 |                           |                      |                                                                                                                                                                                                                                                                                                                                                          |     |
| 29 |                           |                      |                                                                                                                                                                                                                                                                                                                                                          |     |
| 30 |                           |                      |                                                                                                                                                                                                                                                                                                                                                          |     |
| 31 | Allocation:               | <a href="#">#16c</a> | Who will generate the allocation sequence, who will enrol participants, and who will assign participants to interventions                                                                                                                                                                                                                                | 5-6 |
| 32 | implementation            |                      |                                                                                                                                                                                                                                                                                                                                                          |     |
| 33 |                           |                      |                                                                                                                                                                                                                                                                                                                                                          |     |
| 34 |                           |                      |                                                                                                                                                                                                                                                                                                                                                          |     |
| 35 |                           |                      |                                                                                                                                                                                                                                                                                                                                                          |     |
| 36 | Blinding (masking)        | <a href="#">#17a</a> | Who will be blinded after assignment to interventions (eg, trial participants, care providers, outcome assessors, data analysts), and how                                                                                                                                                                                                                | 5-6 |
| 37 |                           |                      |                                                                                                                                                                                                                                                                                                                                                          |     |
| 38 |                           |                      |                                                                                                                                                                                                                                                                                                                                                          |     |
| 39 |                           |                      |                                                                                                                                                                                                                                                                                                                                                          |     |
| 40 |                           |                      |                                                                                                                                                                                                                                                                                                                                                          |     |
| 41 |                           |                      |                                                                                                                                                                                                                                                                                                                                                          |     |
| 42 | Blinding (masking):       | <a href="#">#17b</a> | If blinded, circumstances under which unblinding is permissible, and procedure for revealing a participant's allocated intervention during the trial                                                                                                                                                                                                     | 5-6 |
| 43 | emergency unblinding      |                      |                                                                                                                                                                                                                                                                                                                                                          |     |
| 44 |                           |                      |                                                                                                                                                                                                                                                                                                                                                          |     |
| 45 |                           |                      |                                                                                                                                                                                                                                                                                                                                                          |     |
| 46 |                           |                      |                                                                                                                                                                                                                                                                                                                                                          |     |
| 47 | <b>Methods: Data</b>      |                      |                                                                                                                                                                                                                                                                                                                                                          |     |
| 48 | <b>collection,</b>        |                      |                                                                                                                                                                                                                                                                                                                                                          |     |
| 49 | <b>management, and</b>    |                      |                                                                                                                                                                                                                                                                                                                                                          |     |
| 50 | <b>analysis</b>           |                      |                                                                                                                                                                                                                                                                                                                                                          |     |
| 51 |                           |                      |                                                                                                                                                                                                                                                                                                                                                          |     |
| 52 |                           |                      |                                                                                                                                                                                                                                                                                                                                                          |     |
| 53 |                           |                      |                                                                                                                                                                                                                                                                                                                                                          |     |
| 54 | Data collection plan      | <a href="#">#18a</a> | Plans for assessment and collection of outcome, baseline, and other trial data, including any related processes to promote data quality (eg, duplicate measurements,                                                                                                                                                                                     | 13  |
| 55 |                           |                      |                                                                                                                                                                                                                                                                                                                                                          |     |
| 56 |                           |                      |                                                                                                                                                                                                                                                                                                                                                          |     |
| 57 |                           |                      |                                                                                                                                                                                                                                                                                                                                                          |     |
| 58 |                           |                      |                                                                                                                                                                                                                                                                                                                                                          |     |
| 59 |                           |                      |                                                                                                                                                                                                                                                                                                                                                          |     |
| 60 |                           |                      |                                                                                                                                                                                                                                                                                                                                                          |     |

training of assessors) and a description of study instruments (eg, questionnaires, laboratory tests) along with their reliability and validity, if known. Reference to where data collection forms can be found, if not in the protocol

|    |                            |                      |                                                                |
|----|----------------------------|----------------------|----------------------------------------------------------------|
| 1  |                            |                      |                                                                |
| 2  |                            |                      |                                                                |
| 3  |                            |                      |                                                                |
| 4  |                            |                      |                                                                |
| 5  |                            |                      |                                                                |
| 6  |                            |                      |                                                                |
| 7  |                            |                      |                                                                |
| 8  |                            |                      |                                                                |
| 9  | Data collection plan:      | <a href="#">#18b</a> | Plans to promote participant retention and complete            |
| 10 | retention                  |                      | follow-up, including list of any outcome data to be            |
| 11 |                            |                      | collected for participants who discontinue or deviate from     |
| 12 |                            |                      | intervention protocols                                         |
| 13 |                            |                      |                                                                |
| 14 |                            |                      |                                                                |
| 15 |                            |                      |                                                                |
| 16 | Data management            | <a href="#">#19</a>  | Plans for data entry, coding, security, and storage,           |
| 17 |                            |                      | including any related processes to promote data quality        |
| 18 |                            |                      | (eg, double data entry; range checks for data values).         |
| 19 |                            |                      | Reference to where details of data management                  |
| 20 |                            |                      | procedures can be found, if not in the protocol                |
| 21 |                            |                      |                                                                |
| 22 |                            |                      |                                                                |
| 23 |                            |                      |                                                                |
| 24 | Statistics: outcomes       | <a href="#">#20a</a> | Statistical methods for analysing primary and secondary        |
| 25 |                            |                      | outcomes. Reference to where other details of the              |
| 26 |                            |                      | statistical analysis plan can be found, if not in the protocol |
| 27 |                            |                      |                                                                |
| 28 |                            |                      |                                                                |
| 29 |                            |                      |                                                                |
| 30 | Statistics: additional     | <a href="#">#20b</a> | Methods for any additional analyses (eg, subgroup and          |
| 31 | analyses                   |                      | adjusted analyses)                                             |
| 32 |                            |                      |                                                                |
| 33 |                            |                      |                                                                |
| 34 | Statistics: analysis       | <a href="#">#20c</a> | Definition of analysis population relating to protocol non-    |
| 35 | population and             |                      | adherence (eg, as randomised analysis), and any                |
| 36 | missing data               |                      | statistical methods to handle missing data (eg, multiple       |
| 37 |                            |                      | imputation)                                                    |
| 38 |                            |                      |                                                                |
| 39 |                            |                      |                                                                |
| 40 |                            |                      |                                                                |
| 41 | <b>Methods: Monitoring</b> |                      |                                                                |
| 42 |                            |                      |                                                                |
| 43 | Data monitoring:           | <a href="#">#21a</a> | Composition of data monitoring committee (DMC);                |
| 44 | formal committee           |                      | summary of its role and reporting structure; statement of      |
| 45 |                            |                      | whether it is independent from the sponsor and competing       |
| 46 |                            |                      | interests; and reference to where further details about its    |
| 47 |                            |                      | charter can be found, if not in the protocol. Alternatively,   |
| 48 |                            |                      | an explanation of why a DMC is not needed                      |
| 49 |                            |                      |                                                                |
| 50 |                            |                      |                                                                |
| 51 |                            |                      |                                                                |
| 52 |                            |                      |                                                                |
| 53 |                            |                      |                                                                |
| 54 | Data monitoring:           | <a href="#">#21b</a> | Description of any interim analyses and stopping               |
| 55 | interim analysis           |                      | guidelines, including who will have access to these interim    |
| 56 |                            |                      | results and make the final decision to terminate the trial     |
| 57 |                            |                      |                                                                |
| 58 |                            |                      |                                                                |
| 59 |                            |                      |                                                                |
| 60 |                            |                      |                                                                |

|    |                                      |                      |                                                                                                                                                                                                                                    |     |
|----|--------------------------------------|----------------------|------------------------------------------------------------------------------------------------------------------------------------------------------------------------------------------------------------------------------------|-----|
| 1  | Harms                                | <a href="#">#22</a>  | Plans for collecting, assessing, reporting, and managing solicited and spontaneously reported adverse events and other unintended effects of trial interventions or trial conduct                                                  | n/a |
| 2  |                                      |                      |                                                                                                                                                                                                                                    |     |
| 3  |                                      |                      |                                                                                                                                                                                                                                    |     |
| 4  |                                      |                      |                                                                                                                                                                                                                                    |     |
| 5  |                                      |                      |                                                                                                                                                                                                                                    |     |
| 6  |                                      |                      |                                                                                                                                                                                                                                    |     |
| 7  |                                      |                      |                                                                                                                                                                                                                                    |     |
| 8  | Auditing                             | <a href="#">#23</a>  | Frequency and procedures for auditing trial conduct, if any, and whether the process will be independent from investigators and the sponsor                                                                                        | n/a |
| 9  |                                      |                      |                                                                                                                                                                                                                                    |     |
| 10 |                                      |                      |                                                                                                                                                                                                                                    |     |
| 11 |                                      |                      |                                                                                                                                                                                                                                    |     |
| 12 |                                      |                      |                                                                                                                                                                                                                                    |     |
| 13 |                                      |                      |                                                                                                                                                                                                                                    |     |
| 14 | <b>Ethics and dissemination</b>      |                      |                                                                                                                                                                                                                                    |     |
| 15 |                                      |                      |                                                                                                                                                                                                                                    |     |
| 16 |                                      |                      |                                                                                                                                                                                                                                    |     |
| 17 | Research ethics approval             | <a href="#">#24</a>  | Plans for seeking research ethics committee / institutional review board (REC / IRB) approval                                                                                                                                      | 7   |
| 18 |                                      |                      |                                                                                                                                                                                                                                    |     |
| 19 |                                      |                      |                                                                                                                                                                                                                                    |     |
| 20 |                                      |                      |                                                                                                                                                                                                                                    |     |
| 21 | Protocol amendments                  | <a href="#">#25</a>  | Plans for communicating important protocol modifications (eg, changes to eligibility criteria, outcomes, analyses) to relevant parties (eg, investigators, REC / IRBs, trial participants, trial registries, journals, regulators) | n/a |
| 22 |                                      |                      |                                                                                                                                                                                                                                    |     |
| 23 |                                      |                      |                                                                                                                                                                                                                                    |     |
| 24 |                                      |                      |                                                                                                                                                                                                                                    |     |
| 25 |                                      |                      |                                                                                                                                                                                                                                    |     |
| 26 |                                      |                      |                                                                                                                                                                                                                                    |     |
| 27 |                                      |                      |                                                                                                                                                                                                                                    |     |
| 28 | Consent or assent                    | <a href="#">#26a</a> | Who will obtain informed consent or assent from potential trial participants or authorised surrogates, and how (see Item 32)                                                                                                       | 6   |
| 29 |                                      |                      |                                                                                                                                                                                                                                    |     |
| 30 |                                      |                      |                                                                                                                                                                                                                                    |     |
| 31 |                                      |                      |                                                                                                                                                                                                                                    |     |
| 32 |                                      |                      |                                                                                                                                                                                                                                    |     |
| 33 |                                      |                      |                                                                                                                                                                                                                                    |     |
| 34 | Consent or assent: ancillary studies | <a href="#">#26b</a> | Additional consent provisions for collection and use of participant data and biological specimens in ancillary studies, if applicable                                                                                              | n/a |
| 35 |                                      |                      |                                                                                                                                                                                                                                    |     |
| 36 |                                      |                      |                                                                                                                                                                                                                                    |     |
| 37 |                                      |                      |                                                                                                                                                                                                                                    |     |
| 38 |                                      |                      |                                                                                                                                                                                                                                    |     |
| 39 | Confidentiality                      | <a href="#">#27</a>  | How personal information about potential and enrolled participants will be collected, shared, and maintained in order to protect confidentiality before, during, and after the trial                                               | 7   |
| 40 |                                      |                      |                                                                                                                                                                                                                                    |     |
| 41 |                                      |                      |                                                                                                                                                                                                                                    |     |
| 42 |                                      |                      |                                                                                                                                                                                                                                    |     |
| 43 |                                      |                      |                                                                                                                                                                                                                                    |     |
| 44 |                                      |                      |                                                                                                                                                                                                                                    |     |
| 45 |                                      |                      |                                                                                                                                                                                                                                    |     |
| 46 | Declaration of interests             | <a href="#">#28</a>  | Financial and other competing interests for principal investigators for the overall trial and each study site                                                                                                                      | 8   |
| 47 |                                      |                      |                                                                                                                                                                                                                                    |     |
| 48 |                                      |                      |                                                                                                                                                                                                                                    |     |
| 49 |                                      |                      |                                                                                                                                                                                                                                    |     |
| 50 | Data access                          | <a href="#">#29</a>  | Statement of who will have access to the final trial dataset, and disclosure of contractual agreements that limit such access for investigators                                                                                    | n/a |
| 51 |                                      |                      |                                                                                                                                                                                                                                    |     |
| 52 |                                      |                      |                                                                                                                                                                                                                                    |     |
| 53 |                                      |                      |                                                                                                                                                                                                                                    |     |
| 54 |                                      |                      |                                                                                                                                                                                                                                    |     |
| 55 |                                      |                      |                                                                                                                                                                                                                                    |     |
| 56 | Ancillary and post trial care        | <a href="#">#30</a>  | Provisions, if any, for ancillary and post-trial care, and for compensation to those who suffer harm from trial                                                                                                                    | n/a |
| 57 |                                      |                      |                                                                                                                                                                                                                                    |     |
| 58 |                                      |                      |                                                                                                                                                                                                                                    |     |
| 59 |                                      |                      |                                                                                                                                                                                                                                    |     |
| 60 |                                      |                      |                                                                                                                                                                                                                                    |     |

participation

|    |                       |                      |                                                                 |
|----|-----------------------|----------------------|-----------------------------------------------------------------|
| 1  |                       |                      |                                                                 |
| 2  |                       |                      |                                                                 |
| 3  | Dissemination policy: | <a href="#">#31a</a> | Plans for investigators and sponsor to communicate trial        |
| 4  | trial results         |                      | results to participants, healthcare professionals, the public,  |
| 5  |                       |                      | and other relevant groups (eg, via publication, reporting in    |
| 6  |                       |                      | results databases, or other data sharing arrangements),         |
| 7  |                       |                      | including any publication restrictions                          |
| 8  |                       |                      |                                                                 |
| 9  |                       |                      |                                                                 |
| 10 |                       |                      |                                                                 |
| 11 | Dissemination policy: | <a href="#">#31b</a> | Authorship eligibility guidelines and any intended use of       |
| 12 | authorship            |                      | professional writers                                            |
| 13 |                       |                      |                                                                 |
| 14 |                       |                      |                                                                 |
| 15 | Dissemination policy: | <a href="#">#31c</a> | Plans, if any, for granting public access to the full protocol, |
| 16 | reproducible research |                      | participant-level dataset, and statistical code                 |
| 17 |                       |                      |                                                                 |
| 18 |                       |                      |                                                                 |

## 19 Appendices

|    |                      |                     |                                                               |
|----|----------------------|---------------------|---------------------------------------------------------------|
| 20 |                      |                     |                                                               |
| 21 | Informed consent     | <a href="#">#32</a> | Model consent form and other related documentation            |
| 22 | materials            |                     | given to participants and authorised surrogates               |
| 23 |                      |                     |                                                               |
| 24 |                      |                     |                                                               |
| 25 | Biological specimens | <a href="#">#33</a> | Plans for collection, laboratory evaluation, and storage of   |
| 26 |                      |                     | biological specimens for genetic or molecular analysis in     |
| 27 |                      |                     | the current trial and for future use in ancillary studies, if |
| 28 |                      |                     | applicable                                                    |
| 29 |                      |                     |                                                               |
| 30 |                      |                     |                                                               |
| 31 |                      |                     |                                                               |

32 The SPIRIT checklist is distributed under the terms of the Creative Commons Attribution License CC-  
 33 BY-ND 3.0. This checklist was completed on 28. September 2020 using  
 34 <https://www.goodreports.org/>, a tool made by the [EQUATOR Network](#) in collaboration with  
 35 [Penelope.ai](#)  
 36  
 37  
 38  
 39  
 40  
 41  
 42  
 43  
 44  
 45  
 46  
 47  
 48  
 49  
 50  
 51  
 52  
 53  
 54  
 55  
 56  
 57  
 58  
 59  
 60
